# Supplementary material for: Synthesis of cytochalasan analogues with aryl substituents at position 10
Source: Royal Society of Chemistry journal article supplement (doi:10.1039/d4ob00634h), 2024-01-01

Supporting Information

**Synthesis of Cytochalasan Analogues with Aryl Substituents at Position 10**

Žaneta Javorská,<sup>a</sup> Silvie Rimpelová,<sup>b</sup> Magdaléna Labíková,<sup>a</sup> and Pavla Perlíková<sup>\*a,c</sup>

a) Department of Organic Chemistry, Faculty of Chemical Technology, University of Chemistry and Technology, Prague, Technická 5, 166 28 Prague, Czech Republic. E-mail: [perlikop@vscht.cz](mailto:perlikop@vscht.cz)

b) Department of Biochemistry and Microbiology, Faculty of Food and Biochemical Technology, University of Chemistry and Technology Prague, Technická 5, 166 28 Prague, Czech Republic.

c) Institute of Organic Chemistry and Biochemistry, Czech Academy of Sciences, Flemingovo namesti 2, 160 00 Prague, Czech Republic.

Contents:

|                                                                    |    |
|--------------------------------------------------------------------|----|
| Synthesis of compounds <b>4</b> and <b>5</b> .....                 | S2 |
| Synthesis of compound <b>16</b> using an alternative approach..... | S4 |
| Screening of alternative ligands .....                             | S6 |
| HPLC purity of final cytochalasan analogues .....                  | S7 |
| Copies of NMR spectra .....                                        | S9 |

## Synthesis of compounds 4 and 5

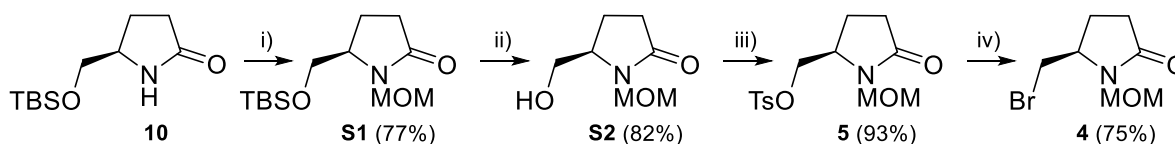

Scheme S1. Reagents and conditions: i) 1. (MeO)<sub>2</sub>CH<sub>2</sub>, AcCl, ZnBr<sub>2</sub>, toluene, RT, 4 h, 2. BuLi, THF, RT, 16 h; ii) (HF)<sub>3</sub>.NEt<sub>3</sub>, DCM/THF, RT, 6 h; iii) TsCl, pyridine, RT, 24 h; iv) LiBr, acetone, 40 °C, 24 h.

### (*R*)-5-[[(*tert*-butyldimethylsilyl)oxy]methyl]-1-(methoxymethyl)pyrrolidin-2-one (S1)

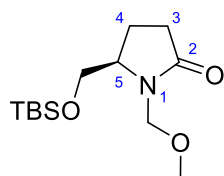

**Preparation of MOMCl:** First, zinc bromide (15 mg, 65.4 μmol) was dried under high vacuum (heatgun 150-200 °C). Then, dry toluene (5 mL) and dimethoxymethane (1.16 mL, 13.1 mmol) were added at RT under argon atmosphere and the resulting mixture was stirred while acetyl chloride (930 μL, 13.1 mmol) was slowly added dropwise (exothermic reaction). The mixture was then stirred for an additional 4 h at RT under argon atmosphere. **Preparation of pyrrolidin-2-one salt:** To a solution of (*R*)-5-[[(*tert*-butyldimethylsilyl)oxy]methyl]pyrrolidin-2-one (**10**) (1.5 g, 6.54 mmol) in dry toluene (8 mL) and dry THF (2 mL), *n*-BuLi (3.9 mL, 2.5 M in hexanes, 9.81 mmol) was added at -78 °C under argon atmosphere and stirred at 0 °C for 1 h. **Preparation of product:** The mixture containing pyrrolidin-2-one salt was slowly added to the mixture containing MOMCl at 0 °C under argon atmosphere and stirred at RT for 16 h. Then, EtOAc (20 mL) and a solution of NH<sub>4</sub>Cl (20 mL) were added and resulting mixture was vigorously stirred for an additional 2 h. The layers were separated and aqueous phase was extracted with EtOAc (2 × 20 mL) and the combined organic layers were washed with a solution of NaHCO<sub>3</sub> (25 mL), brine (25 mL), dried (MgSO<sub>4</sub>) and the solvent was evaporated *in vacuo*. The crude product was purified by flash chromatography on silica gel (eluent: EtOAc in hexane 0% to 100%, product elutes at 50%) to give **S1** (1.37 mg, 77%) as a yellowish oil. <sup>1</sup>H NMR (400 MHz, CDCl<sub>3</sub>) δ 4.80 (d, *J*<sub>gem</sub> = 10.5 Hz, 1H, NCH<sub>2</sub>a), 4.64 (d, *J*<sub>gem</sub> = 10.5 Hz, 1H, NCH<sub>2</sub>b), 3.78 – 3.71 (m, 2H, OCH<sub>2</sub>a, H-5), 3.62 (m, Σ*J* = 16.5 Hz, 1H, OCH<sub>2</sub>b), 3.27 (s, 3H, OCH<sub>3</sub>), 2.51 (m, Σ*J* = 35.3 Hz, 1H, H-3a), 2.33 (ddd, *J*<sub>gem</sub> = 17.1, *J*<sub>3b,4b</sub> = 10.0, *J*<sub>3b,4a</sub> = 4.6 Hz, 1H, H-3b), 2.15 – 2.01 (m, Σ*J* = 48.3 Hz, 1H, H-4a), 1.91 (dddd, *J*<sub>gem</sub> = 13.4, *J*<sub>4b,3b</sub> = 10.0, *J*<sub>4b,3a</sub> = 4.7, *J*<sub>4b,5</sub> = 3.6 Hz, 1H, H-4b), 0.85 (s, 9H, C(CH<sub>3</sub>)<sub>3</sub>), 0.03 (s, 3H, SiCH<sub>3</sub>), 0.02 (s, 3H, SiCH<sub>3</sub>) ppm. <sup>13</sup>C NMR (101 MHz, CDCl<sub>3</sub>) δ 176.91 (C-2), 72.58 (NCH<sub>2</sub>), 63.74 (OCH<sub>2</sub>), 58.46 (CH-5), 56.03 (OCH<sub>3</sub>), 30.47 (CH<sub>2</sub>-3), 25.71 (SiCCH<sub>3</sub>), 21.48 (CH<sub>2</sub>-4), 18.08 (SiCCH<sub>3</sub>), -5.63 (2xSiCH<sub>3</sub>) ppm. HRMS (ESI) *m/z* calcd for C<sub>13</sub>H<sub>27</sub>O<sub>3</sub>NNaSi [M+Na]<sup>+</sup> 296.1652; found 296.1653.

### (*R*)-5-(hydroxymethyl)-1-(methoxymethyl)pyrrolidin-2-one (S2)

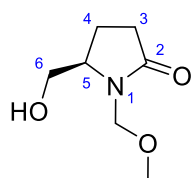

This compound was synthesized following the procedure for the preparation of compound **19**. Triethylamine trihydrofluoride (4.10 mL, 25.2 mmol) was added to a solution of **S1** (1.15 g, 4.19 mmol) in dry DCM (10 mL) and dry THF (10 mL) at RT under argon atmosphere and the resulting mixture was stirred until full conversion (18 h, TLC, EtOAc/MeOH : 20/1). A solution of NaHCO<sub>3</sub> (30 mL) was slowly added (release of gas) and the resulting mixture was extracted with DCM (5 × 50 mL). The combined organic layers were dried (MgSO<sub>4</sub>) and the solvent was evaporated *in vacuo*. The crude product was purified by flash chromatography on silica gel (eluent: MeOH in EtOAc 0% to 5%, product elutes at 5%) to give **S2** (550 mg, 82%) as a colorless oil. <sup>1</sup>H NMR (400 MHz, CDCl<sub>3</sub>) δ 5.05 (d, *J*<sub>gem</sub> = 10.3 Hz, 1H, NCH<sub>2</sub>a), 4.40 (d, *J*<sub>gem</sub> = 10.4 Hz, 1H, NCH<sub>2</sub>b), 3.76 – 3.67 (m, 2H, H-5,6a), 3.52 (m, Σ*J* = 26.7 Hz, 1H, H-6b), 3.40 (dd, *J*<sub>OH,6a</sub> = 8.1, *J*<sub>OH,6b</sub> = 5.7 Hz, 1H, OH), 3.38 (s, 3H, OCH<sub>3</sub>), 2.49 (ddd, *J*<sub>gem</sub> = 17.5, *J*<sub>3a,4b</sub> = 10.0, *J*<sub>3a,4a</sub> = 6.6 Hz, 1H, H-3a), 2.38 (ddd, *J*<sub>gem</sub> = 17.4, *J*<sub>3b,4a</sub> = 10.1, *J*<sub>3b,4b</sub> = 6.6 Hz, 1H, H-3b), 2.12 (dddd, *J*<sub>gem</sub> = 13.2, *J*<sub>4a,3b</sub> = 10.1, *J*<sub>4a,5</sub> = 8.2, *J*<sub>4a,3a</sub> = 6.6 Hz, 1H, H-4a), 1.80 (m, Σ*J* = 36.5 Hz, 1H, H-4b) ppm. <sup>13</sup>C NMR (101 MHz, CDCl<sub>3</sub>) δ 176.70 (C-2), 73.56 (NCH<sub>2</sub>), 65.01 (CH<sub>2</sub>-6), 61.30 (CH-5), 56.37

(OCH<sub>3</sub>), 30.18 (CH<sub>2</sub>-3), 20.55 (CH<sub>2</sub>-4) ppm. **HRMS** (ESI) *m/z* calcd for C<sub>7</sub>H<sub>13</sub>O<sub>3</sub>NNa [M+Na]<sup>+</sup> 182.0788; found 182.0787.

#### (R)-5-(bromomethyl)-1-(methoxymethyl)pyrrolidin-2-one (4)

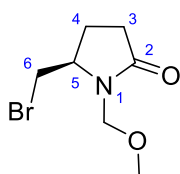

First, lithium bromide (108 mg, 1.25 mmol) was dried under high vacuum (heatgun 150-200 °C). Then, dry acetone (5 mL) and **5** (80 mg, 0.26 mmol) were added at RT under argon atmosphere and the resulting mixture was stirred at 40 °C until full conversion (24 h, TLC, EtOAc). After cooling reaction mixture to RT, H<sub>2</sub>O (5 ml) was added. The resulting mixture was extracted with Et<sub>2</sub>O (1 × 10 mL) and EtOAc (2 × 10 mL). The combined organic layers were washed with brine (15 mL), dried (MgSO<sub>4</sub>) and the solvent was evaporated *in vacuo*. The crude product was purified by flash chromatography on silica gel (eluent: EtOAc in hexane 0% to 100%, product elutes at 100%) to give **4** (43 mg, 75%) as a colorless oil. **<sup>1</sup>H NMR** (400 MHz, CDCl<sub>3</sub>) δ 4.76 (d, *J*<sub>gem</sub> = 10.9 Hz, 1H, NCH<sub>2</sub>a), 4.67 (d, *J*<sub>gem</sub> = 10.8 Hz, 1H, NCH<sub>2</sub>b), 3.98 (dtd, *J*<sub>5,4a</sub> = 8.4, *J*<sub>5,4b</sub> = *J*<sub>5,6a</sub> = 4.8, *J*<sub>5,6b</sub> = 3.8 Hz, 1H, H-5), 3.57 (m, Σ*J* = 28.1 Hz, 2H, H-6a,b), 3.30 (s, 3H, OCH<sub>3</sub>), 2.58 (ddd, *J*<sub>gem</sub> = 17.3, *J*<sub>3a,4b</sub> = 10.1, *J*<sub>3a,4a</sub> = 7.0 Hz, 1H, H-3a), 2.39 (ddd, *J*<sub>gem</sub> = 17.3, *J*<sub>3b,4a</sub> = 10.3, *J*<sub>3b,4b</sub> = 5.6 Hz, 1H, H-3b), 2.22 (dddd, *J*<sub>gem</sub> = 13.2, *J*<sub>4a,3b</sub> = 10.2, *J*<sub>4a,5</sub> = 8.3, *J*<sub>4a,3a</sub> = 7.0 Hz, 1H, H-4a), 1.98 (dddd, *J*<sub>gem</sub> = 13.3, *J*<sub>4b,3a</sub> = 10.1, *J*<sub>4b,3b</sub> = 5.6, *J*<sub>4b,5</sub> = 4.4 Hz, 1H, H-4b) ppm. **<sup>13</sup>C NMR** (101 MHz, CDCl<sub>3</sub>) δ 176.17 (C-2), 72.74 (NCH<sub>2</sub>), 57.22 (CH<sub>2</sub>-5), 56.43 (OCH<sub>3</sub>), 35.52 (CH<sub>2</sub>-6), 29.84 (CH<sub>2</sub>-3), 23.03 (CH<sub>2</sub>-4) ppm. **HRMS** (ESI) *m/z* calcd for C<sub>7</sub>H<sub>12</sub>O<sub>2</sub>N<sup>79</sup>BrNa [M+Na]<sup>+</sup> 243.9944; found 243.9944.

#### (R)-(1-(methoxymethyl)-5-oxopyrrolidin-2-yl)methyl 4-methylbenzenesulfonate (5)

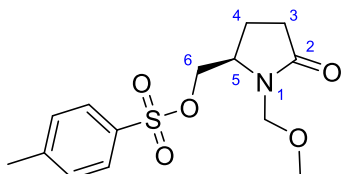

A solution of **S2** (522 mg, 3.28 mmol) in dry pyridine (5 mL) was treated with TsCl (988 mg, 5.18 mmol) at RT under argon atmosphere and the resulting mixture was stirred until full conversion (24 h, TLC, EtOAc). Next, H<sub>2</sub>O (45 ml) was added and the solution was stirred for an additional 5 min. Then, DCM (50 mL) was added, the resulting phases were separated and the aqueous phase was extracted with DCM (2 × 25 mL). The combined organic layers were washed with 10% citric acid (30 mL), 8% NaHCO<sub>3</sub> (45 mL), dried (MgSO<sub>4</sub>) and the solvent was evaporated *in vacuo*. The FC of the residue on silica gel (eluent: EtOAc in hexane 0% to 100%, product elutes at 100%) furnished compound **5** (957 mg, 93%) as a yellowish oil. **<sup>1</sup>H NMR** (400 MHz, CDCl<sub>3</sub>) δ 7.76 (d, *J*<sub>H-o-Ts,H-m-Ts</sub> = 8.2 Hz, 2H, 2xH-*o*-Ts), 7.35 (d, *J*<sub>H-m-Ts,H-o-Ts</sub> = 7.9 Hz, 2H, 2xH-*m*-Ts), 4.63 (d, *J*<sub>gem</sub> = 10.8 Hz, 1H, NCH<sub>2</sub>a), 4.51 (d, *J*<sub>gem</sub> = 10.7 Hz, 1H, NCH<sub>2</sub>b), 4.12 (m, Σ*J* = 29.8 Hz, 2H, H-6a,b), 3.88 (dq, *J*<sub>5,4a</sub> = 8.3, *J*<sub>5,4b</sub> = *J*<sub>5,6a</sub> = *J*<sub>5,6b</sub> = 4.1 Hz, 1H, H-5), 3.18 (s, 3H, OCH<sub>3</sub>), 2.55 – 2.43 (m, 4H, OTs-CH<sub>3</sub>, H-3a), 2.34 (ddd, *J*<sub>gem</sub> = 17.3, *J*<sub>3b,4a</sub> = 10.0, *J*<sub>3b,4b</sub> = 5.0 Hz, 1H, H-3b), 2.16 (dddd, *J*<sub>gem</sub> = 13.2, *J*<sub>4a,3b</sub> = 10.0, *J*<sub>4a,5</sub> = 8.6, *J*<sub>4a,3a</sub> = 7.9 Hz, 1H, H-4a), 1.91 (dddd, *J*<sub>gem</sub> = 13.3, *J*<sub>4b,3a</sub> = 9.9, *J*<sub>4b,3b</sub> = 4.9, *J*<sub>4b,5</sub> = 4.1 Hz, 1H, H-4b) ppm. **<sup>13</sup>C NMR** (101 MHz, CDCl<sub>3</sub>) δ 176.08 (C-2), 145.26 (C-*p*-OTs), 132.32 (C-*i*-OTs), 129.96 (C-*m*-OTs), 127.85 (C-*o*-OTs), 72.62 (NCH<sub>2</sub>), 69.46 (CH<sub>2</sub>-6), 56.04 (OCH<sub>3</sub>), 55.82 (CH<sub>2</sub>-5), 29.77 (CH<sub>2</sub>-3), 21.63 (OTs-CH<sub>3</sub>), 21.16 (CH<sub>2</sub>-4) ppm. **HRMS** (ESI) *m/z* calcd for C<sub>14</sub>H<sub>19</sub>O<sub>5</sub>NNaS [M+Na]<sup>+</sup> 336.0876; found 336.0875.

## Synthesis of compound 16 using an alternative approach

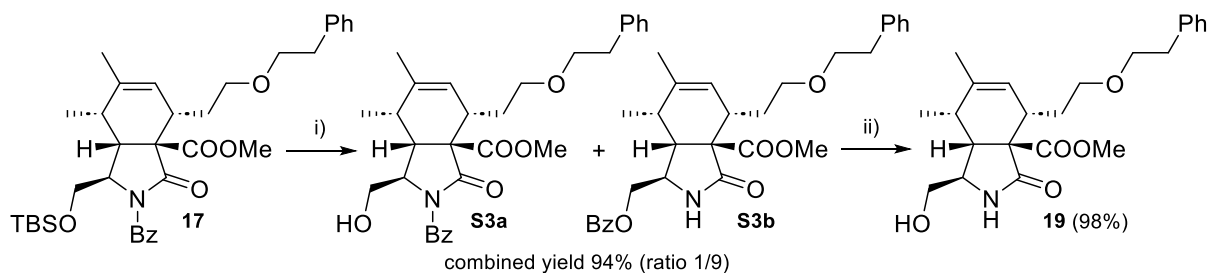

Scheme S2. Reagents and conditions: i)  $(\text{HF})_3\cdot\text{NEt}_3$ ,  $\text{CH}_3\text{CN}$ , RT, 24 h ii) Na, MeOH, RT, 30 min.

### Mixture of methyl (1*R*,3*aR*,4*S*,7*S*,7*aR*)-2-benzoyl-1-(hydroxymethyl)-6,7-dimethyl-3-oxo-4-(2-phenethoxyethyl)-1,2,3,4,7,7*a*-hexahydro-3*aH*-isoindole-3*a*-carboxylate (S3a) and methyl (1*R*,3*aR*,4*S*,7*S*,7*aR*)-1-[(benzoyloxy)methyl]-6,7-dimethyl-3-oxo-4-(2-phenethoxyethyl)-1,2,3,4,7,7*a*-hexahydro-3*aH*-isoindole-3*a*-carboxylate (S3b)

Triethylamine trihydrofluoride (284  $\mu\text{L}$ , 1.74 mmol) was added to a solution of **17** (157 mg, 0.25 mmol) in dry acetonitrile (3 mL) at RT under argon atmosphere and the resulting mixture was stirred until full conversion (24 h, TLC, hexanes/EtOAc : 1/1). A solution of  $\text{NaHCO}_3$  (5 mL) was slowly added (release of gas) and the resulting mixture was extracted with DCM (3  $\times$  15 mL) and EtOAc (1  $\times$  15 mL). The combined organic layers were washed with brine (5 mL), dried ( $\text{MgSO}_4$ ) and the solvent was evaporated *in vacuo*. The crude products were purified by flash chromatography on silica gel (eluent: EtOAc in hexane 0% to 100%, product elutes at 40%) to give inseparable mixture (120 mg, 94%) of two products **S3b** and unstable **S3a** in ratio 9/1 as a colorless dense oil. Product **S3a** undergoes spontaneous isomerization to product **S3b**. Due to the instability of **S3a**, it is not possible to obtain clean  $^1\text{H}$  and  $^{13}\text{C}$  NMR spectra. Therefore, only the  $^1\text{H}$  NMR of the compound **S3a** in the mixture is presented. **HRMS** (ESI) (mixture)  $m/z$  calcd for  $\text{C}_{30}\text{H}_{35}\text{O}_6\text{NNa}$   $[\text{M}+\text{Na}]^+$  528.2357; found 528.2349.

### Methyl (1*R*,3*aR*,4*S*,7*S*,7*aR*)-2-benzoyl-1-(hydroxymethyl)-6,7-dimethyl-3-oxo-4-(2-phenethoxyethyl)-1,2,3,4,7,7*a*-hexahydro-3*aH*-isoindole-3*a*-carboxylate (S3a)

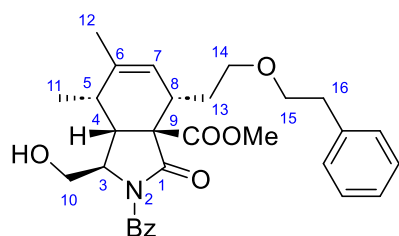

$^1\text{H}$  NMR (400 MHz,  $\text{CDCl}_3$ )  $\delta$  7.62 (m,  $\Sigma J = 12.0$  Hz, 2H, H-*o*-Bz), 7.51 (m,  $\Sigma J = 20.0$  Hz, 1H, H-*p*-Bz), 7.44 – 7.37 (m, 2H overlapped, H-*m*-Bz), 7.30 – 7.15 (m, 5H overlapped, H-*o,m,p*-Ph), 5.52 (m,  $\Sigma J = 12.0$  Hz, 1H, H-7), 4.15 – 4.09 (m, 1H overlapped, H-10a), 3.90 (dd,  $J_{\text{gem}} = 11.7$ ,  $J_{10b,3} = 3.2$  Hz, 1H, H-10b), 3.81 (s, 3H,  $\text{OCH}_3$ ), 3.72 – 3.44 (m, 5H overlapped, H-3,14,15), 2.90 – 2.82 (m, 2H overlapped, H-16), 2.76 – 2.70 (m, 2H overlapped, H-4,8), 2.57 (m,  $\Sigma J = 20.0$  Hz, 1H, H-5), 2.20 – 2.11 (m, 3H overlapped, H-13a), 1.96 – 1.84 (m, 3H overlapped, H-13b), 1.79 – 1.76 (m, 3H overlapped, H-12), 1.28 (d,  $J_{11,5} = 7.3$  Hz, 3H) ppm.

### Methyl (1*R*,3*aR*,4*S*,7*S*,7*aR*)-1-[(benzoyloxy)methyl]-6,7-dimethyl-3-oxo-4-(2-phenethoxyethyl)-1,2,3,4,7,7*a*-hexahydro-3*aH*-isoindole-3*a*-carboxylate (S3b)

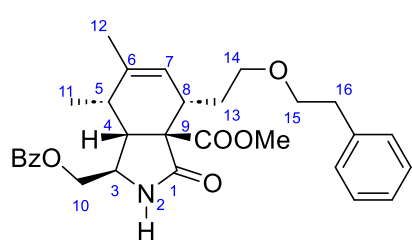

$^1\text{H}$  NMR (400 MHz,  $\text{CDCl}_3$ )  $\delta$  8.06 (m,  $\Sigma J = 11.6$  Hz, 2H, H-*o*-Bz), 7.56 (ddt,  $J_{p,m} = 7.9$ ,  $J_{p,m} = 6.9$ ,  $J_{p,o} = 1.4$  Hz, 1H, H-*p*-Bz), 7.44 (m,  $\Sigma J = 18.5$  Hz, 2H, H-*m*-Bz), 7.30 – 7.15 (m, 5H, H-*o,m,p*-Ph), 6.83 (s, 1H, NH), 5.55 (m,  $\Sigma J = 7.8$  Hz, 1H, H-7), 4.44 (dd,  $J_{\text{gem}} = 11.1$ ,  $J_{10a,3} = 3.5$  Hz, 1H, H-10a), 4.05 (dd,  $J_{\text{gem}} = 11.1$ ,  $J_{10b,3} = 8.8$  Hz, 1H, H-10b), 3.72 – 3.50 (m, 7H,  $\text{OCH}_3$ , H-14,15), 3.42 (m,  $\Sigma J = 20.8$  Hz, 1H, H-3), 2.88 (t,  $J_{16,15} = 7.2$  Hz, 2H, H-16), 2.74 (m,  $\Sigma J = 13.8$  Hz, 1H, H-8), 2.53 – 2.46 (m, 2H, H-4,5), 2.16 (m,  $\Sigma J = 32.0$  Hz, 1H, H-13b), 1.90 (ddt,  $J_{\text{gem}} = 13.9$ ,  $J_{13b,14a} = 11.2$ ,  $J_{13b,14b} = J_{13b,8} = 5.5$  Hz, 1H, H-13b), 1.77 (s, 3H, H-12), 1.22 (d,  $J_{11,5} = 7.0$  Hz, 3H, H-11) ppm.  $^{13}\text{C}$  NMR (101 MHz,  $\text{CDCl}_3$ )  $\delta$  174.25 (C-1), 172.70 ( $\text{COOCH}_3$ ), 166.27 (C=O-Bz), 139.25 (C-*i*-Ph), 138.92 (C-6), 133.39 (C-*p*-Bz), 129.74 (C-*o*-Bz), 129.34 (C-*i*-Bz), 128.95 (C-*o*-Ph), 128.48 (C-*m*-Bz), 128.20 (C-*m*-Ph), 126.88 (C-7), 125.98 (C-*p*-

Ph), 71.38 (C-15), 69.86 (C-14), 68.43 (C-10), 59.80 (C-9), 53.21 (C-3), 52.70 (COOCH<sub>3</sub>), 50.64 (C-4), 36.43 (C-8), 36.33 (C-16), 33.90 (C-5), 29.99 (C-13), 20.27 (C-12), 14.03 (C-11) ppm. **HRMS** (ESI) *m/z* calcd for C<sub>30</sub>H<sub>35</sub>O<sub>6</sub>NNa [M+Na]<sup>+</sup> 528.2357; found 528.2354.

## Screening of alternative ligands

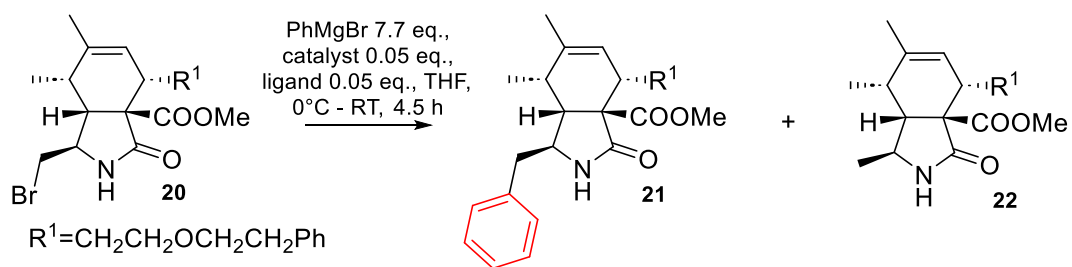

Scheme S3. Optimization of the cross-coupling reaction using cytochalasan bromide **20**

Table 1. Optimization of the cross-coupling reaction using cytochalasan bromide **20**

| Entry | Catalyst              | Ligand | NMR ratio<br>20:21:22 |
|-------|-----------------------|--------|-----------------------|
| S1    | -                     | TMEDA  | 86:14:0               |
| S2    | Fe(acac) <sub>3</sub> | -      | 18:36:46              |
| S3    | Fe(acac) <sub>3</sub> | Ipr    | 12:41:47              |
| S4    | Fe(acac) <sub>3</sub> | IMes   | 21:30:49              |
| S5    | Fe(acac) <sub>3</sub> | Bipy   | 15:35:50              |

## HPLC purity of final cytochalasan analogues

### Separation conditions:

A: Galo-RP (3  $\mu\text{m}$ , 120  $\text{\AA}$ , 3.0  $\times$  150 mm i.d.), mobile phase: MeCN/H<sub>2</sub>O (7/3), flow rate: 0.6 mL/min.

B: XBridge C18 (5  $\mu\text{m}$ , 130  $\text{\AA}$ , 4.0  $\times$  100 mm i.d.), mobile phase: MeCN/H<sub>2</sub>O (7/3), flow rate: 0.75 mL/min.

| Sample | Purity (%) | Separation conditions | Retention time (min) |
|--------|------------|-----------------------|----------------------|
| 22     | 98.1       | A                     | 2.18                 |
| 23     | 98.0       | B                     | 9.83                 |
| 24     | 96.5       | B                     | 9.80                 |
| 25     | 99.9       | A                     | 3.18                 |
| 26     | 95.2       | B                     | 11.95                |
| 27     | 96.8       | B                     | 7.96                 |
| 28     | 98.7       | A                     | 2.53                 |

22 – purity 98.1,  $T_R = 2.18$  min

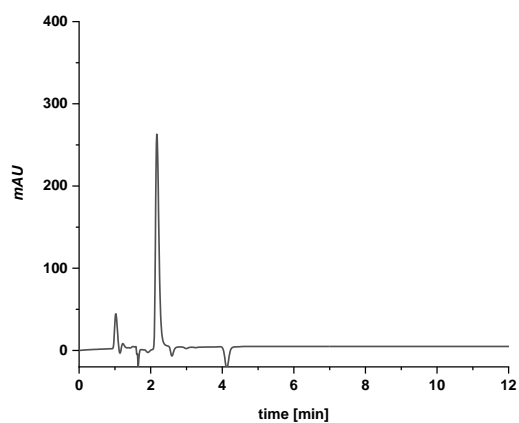

23 – purity 98.0,  $T_R = 9.83$  min

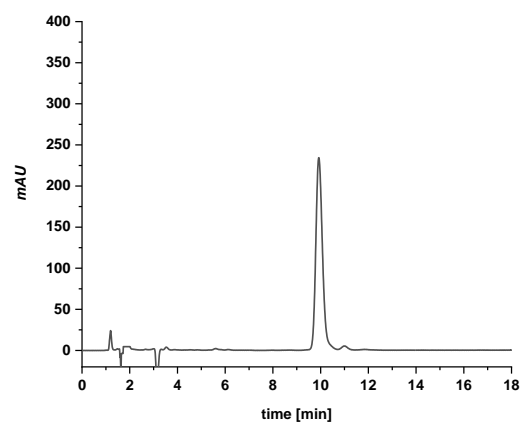

24 – purity 96.5,  $T_R = 9.80$  min

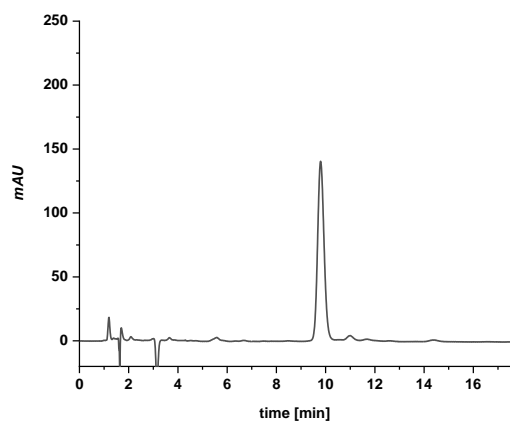

25 – purity 99.9,  $T_R = 3.18$  min

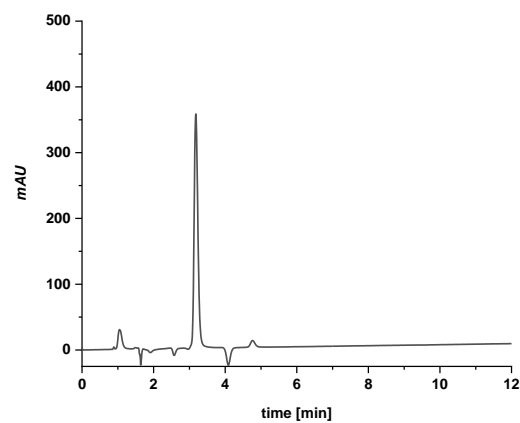

---

**26** – purity 95.2,  $T_R = 11.95$  min

---

**27** – purity 96.8,  $T_R = 7.96$  min

---

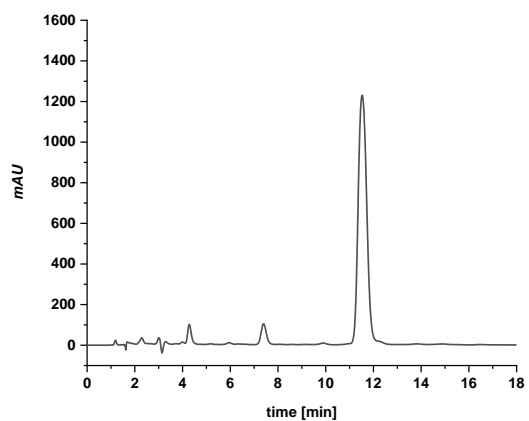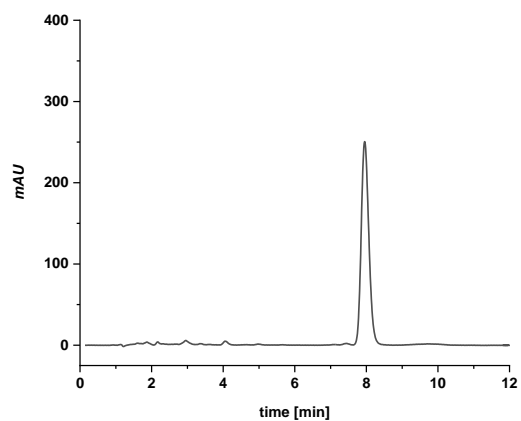

---

**28** – purity 98.7,  $T_R = 2.53$  min

---

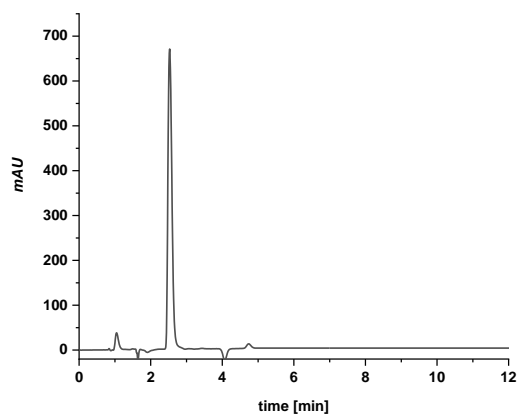



# Copies of NMR spectra

4

ZJA-257-A  
Perlikova single\_pulse

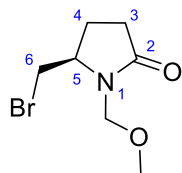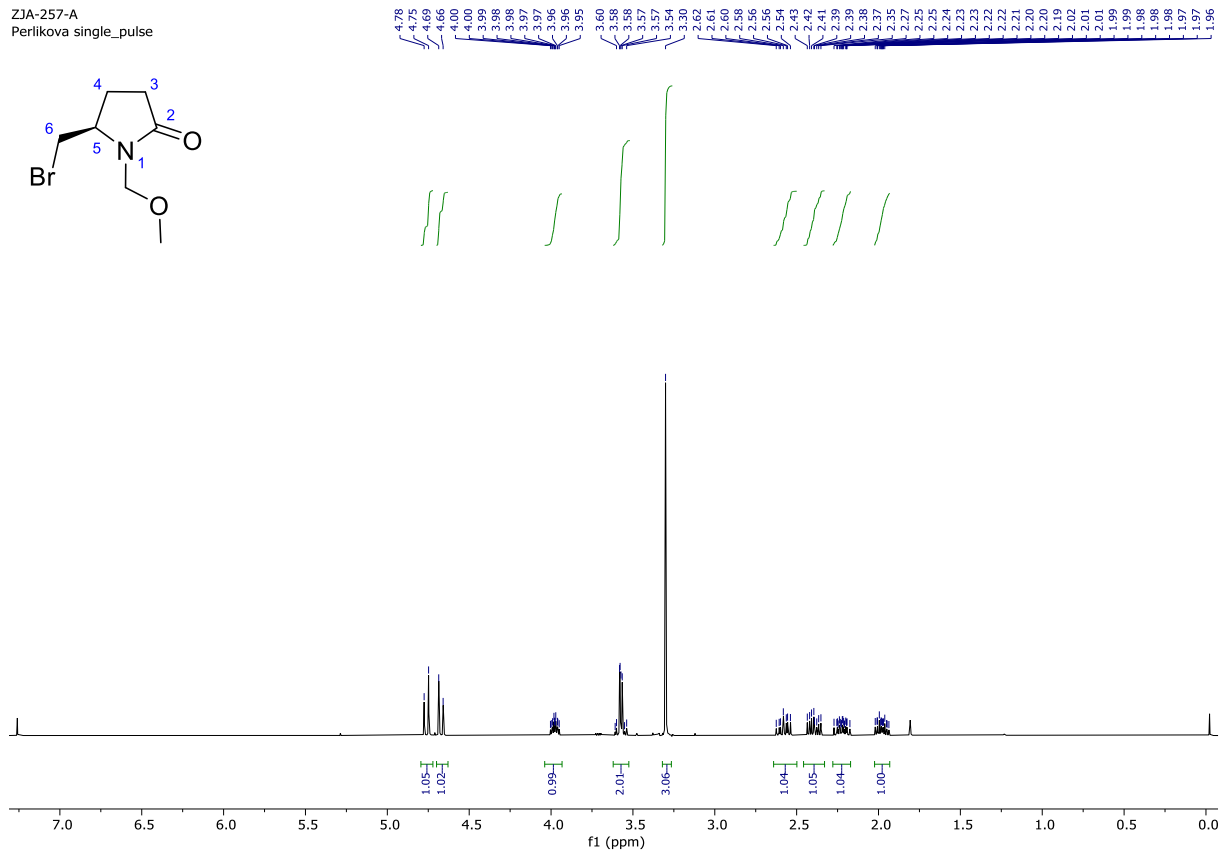

ZJA-257-A  
Perlikova single pulse decoupled gated NOE

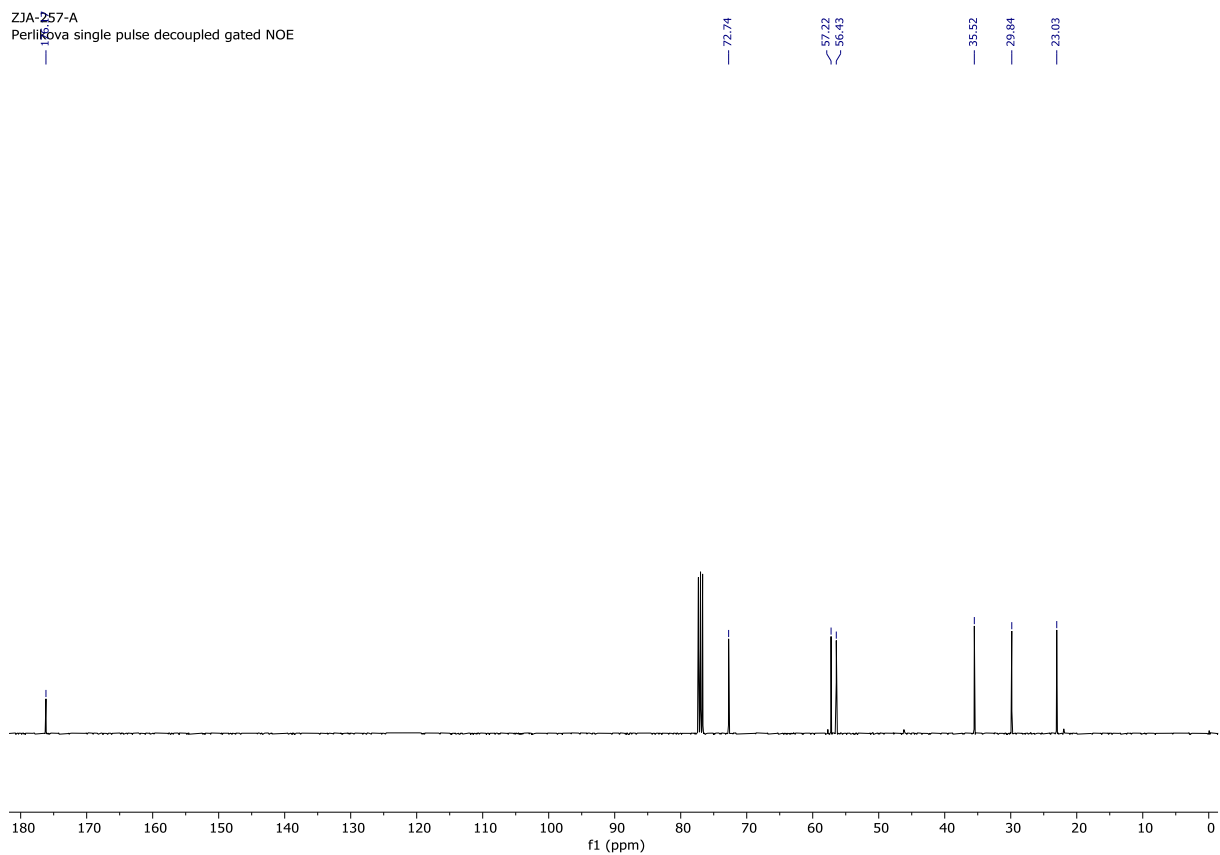

5

ZJA-039C

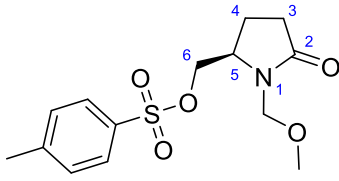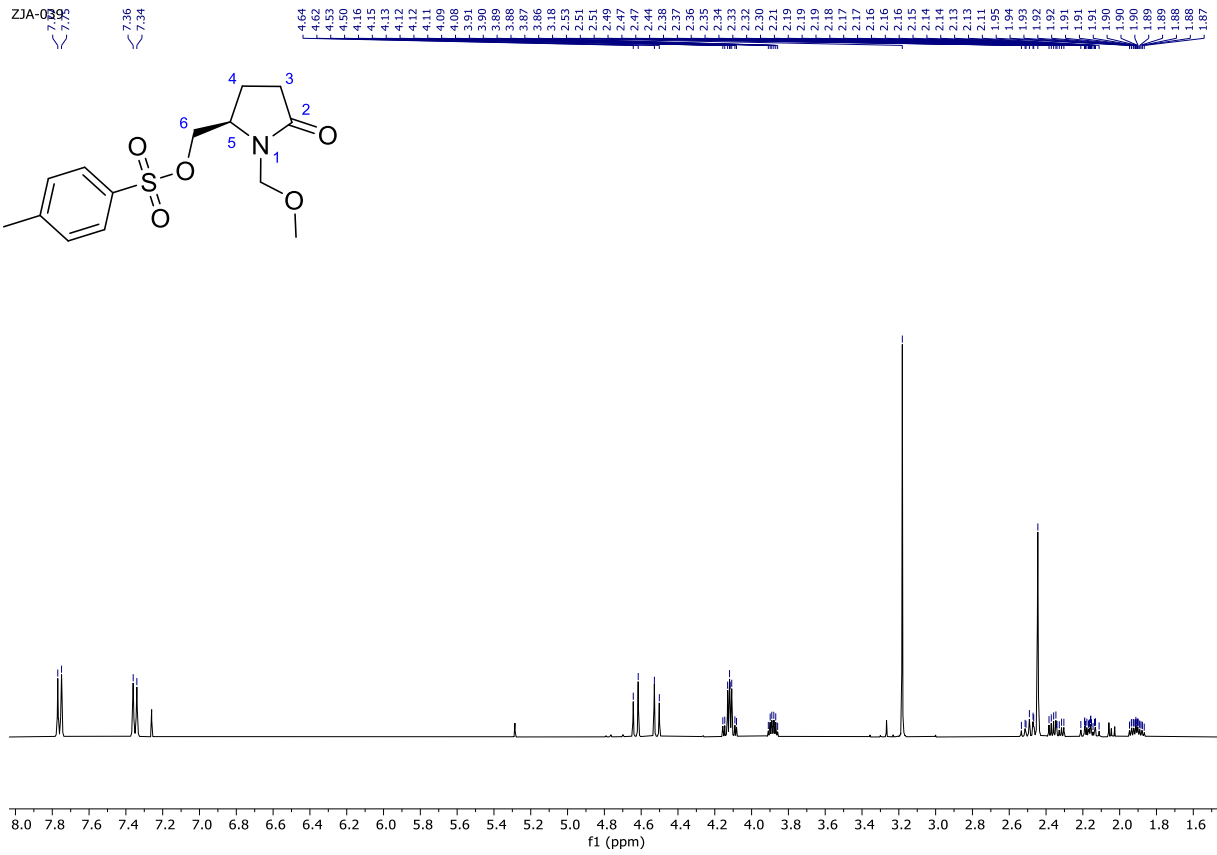

ZJA-039C

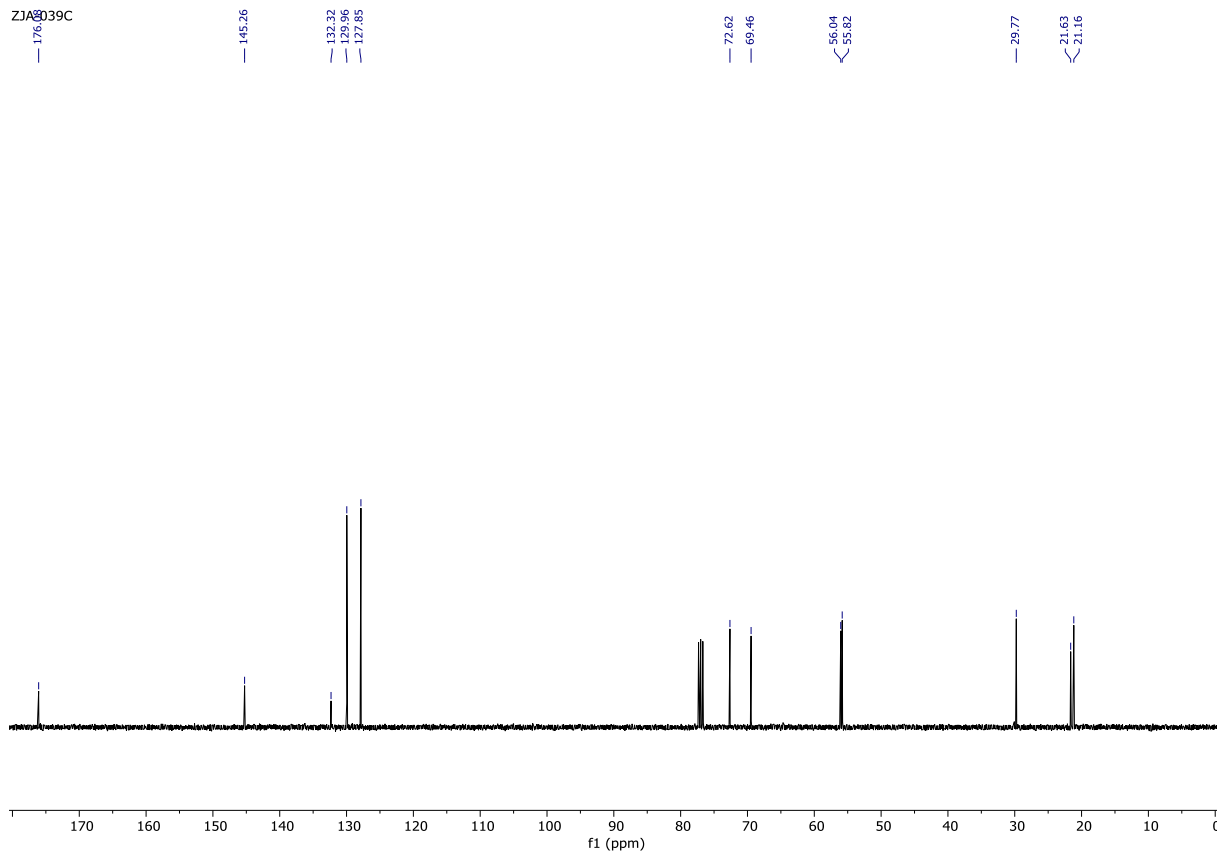

6

ZJA097-E  
Perikova single pulse

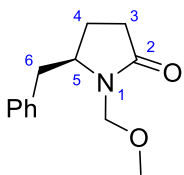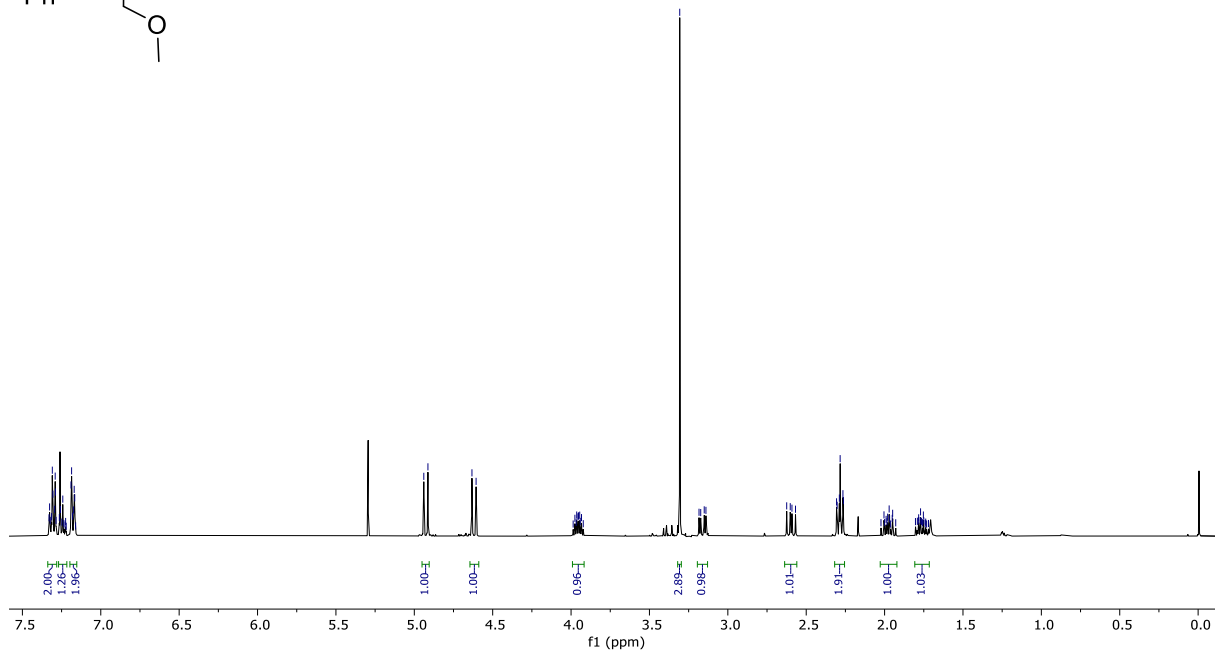

ZJA097-E  
Perikova single pulse decoupled gated NOE

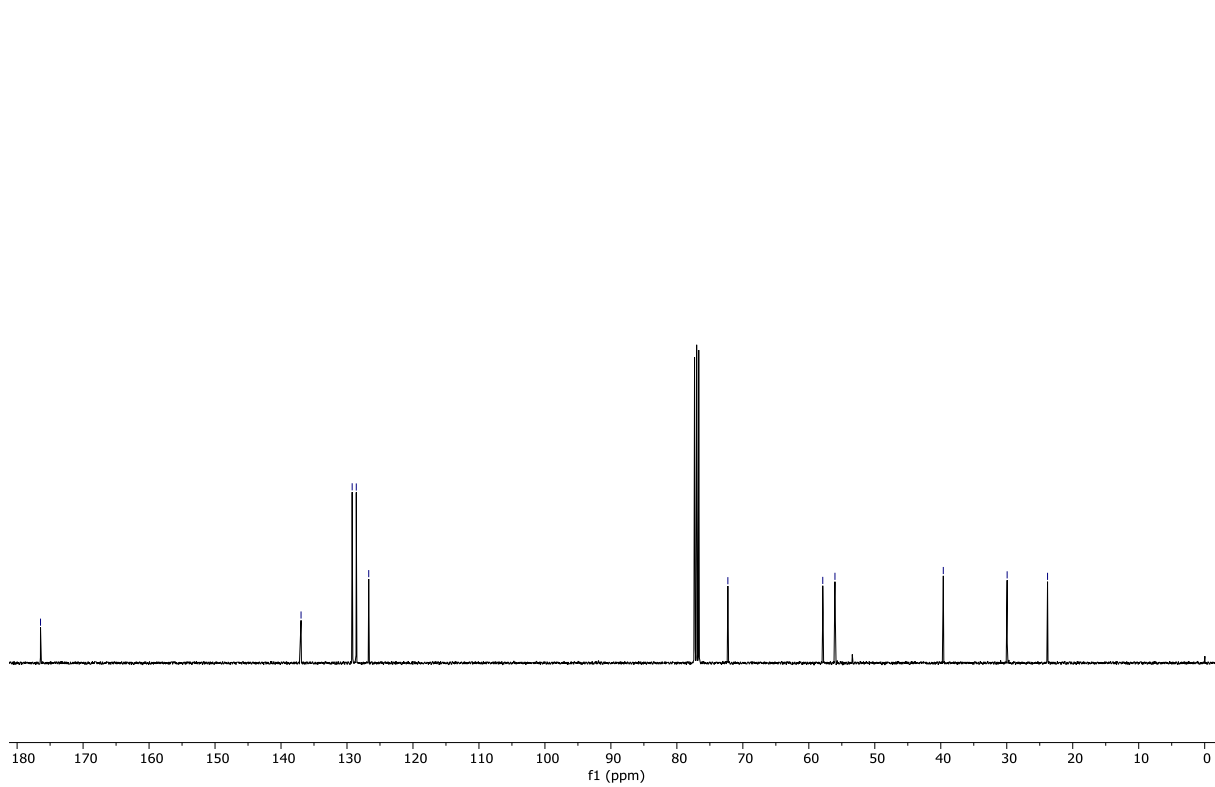

8

3.92, 3.91, 3.90, 3.89, 3.88, 3.87, 3.86, 3.85, 2.85, 2.84, 2.82, 2.80, 2.76, 2.74, 2.72, 2.70, 2.33, 2.32, 2.31, 2.30, 2.29, 2.28, 2.27, 2.26, 2.25, 2.24, 2.23, 2.21, 2.19, 1.88, 1.86, 1.85, 1.84, 1.83, 1.82, 1.81, 1.80

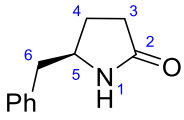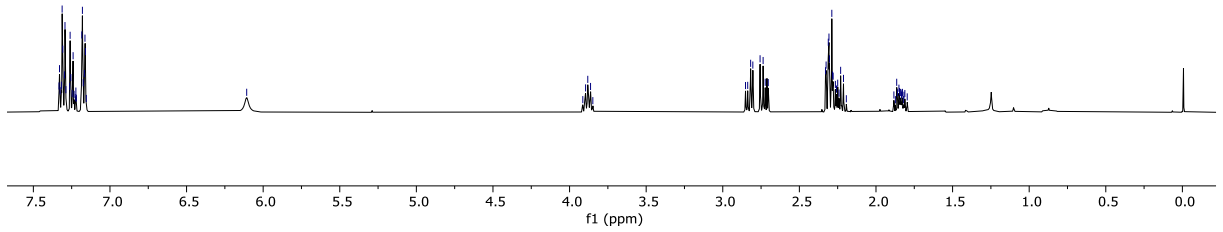



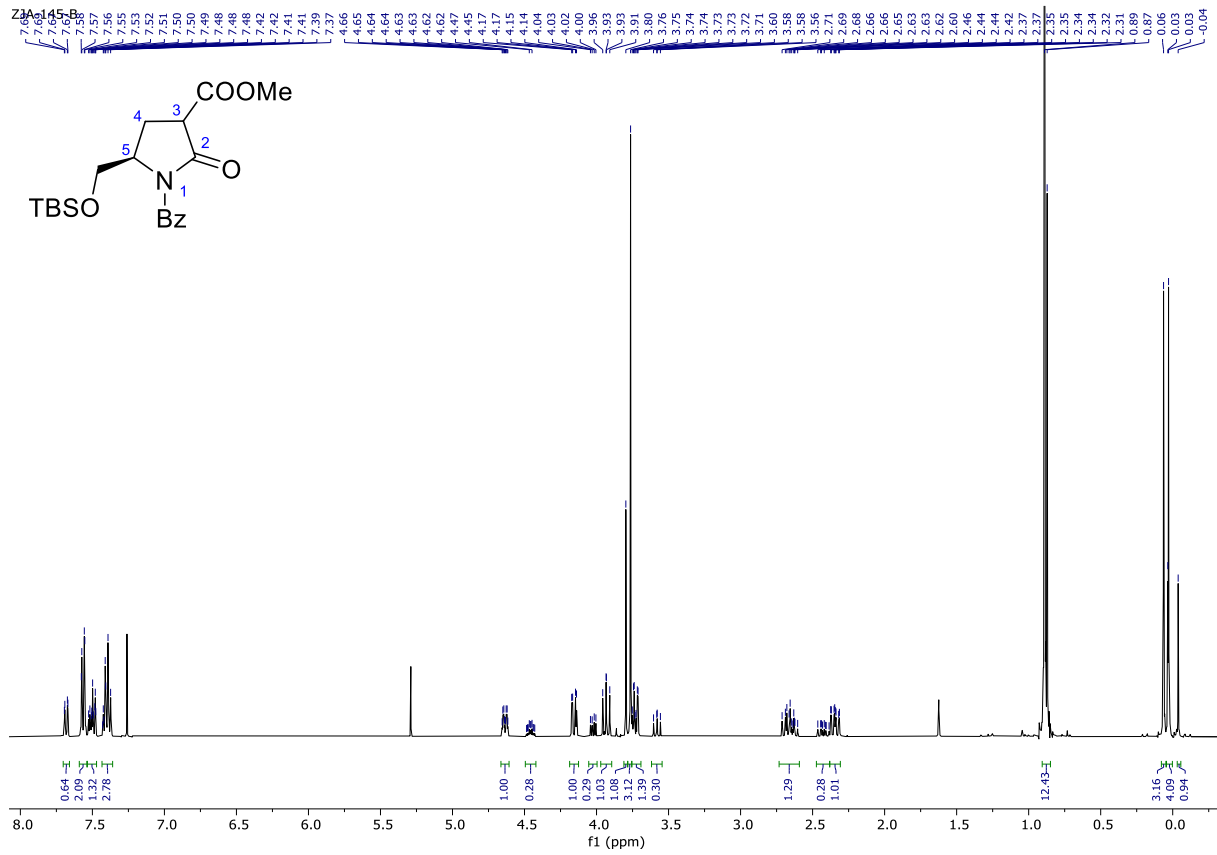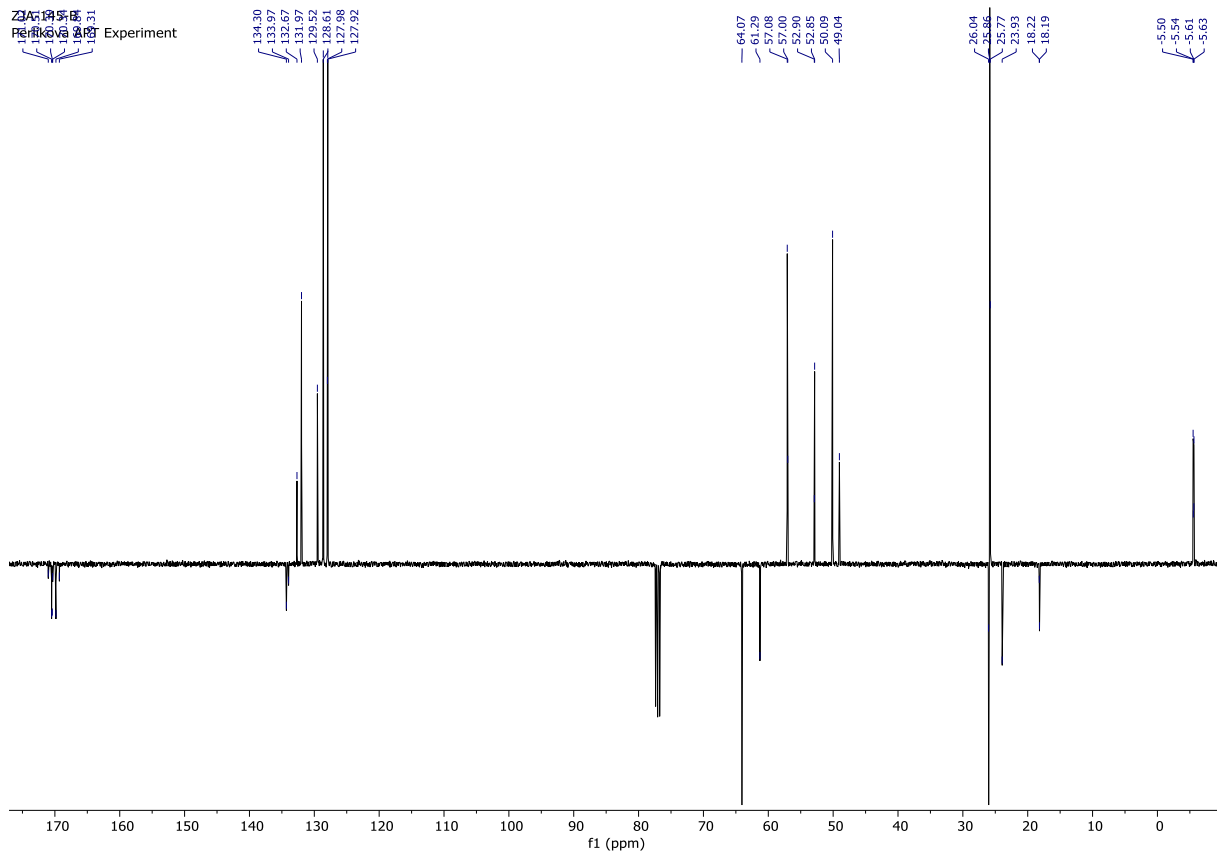

# 13-major

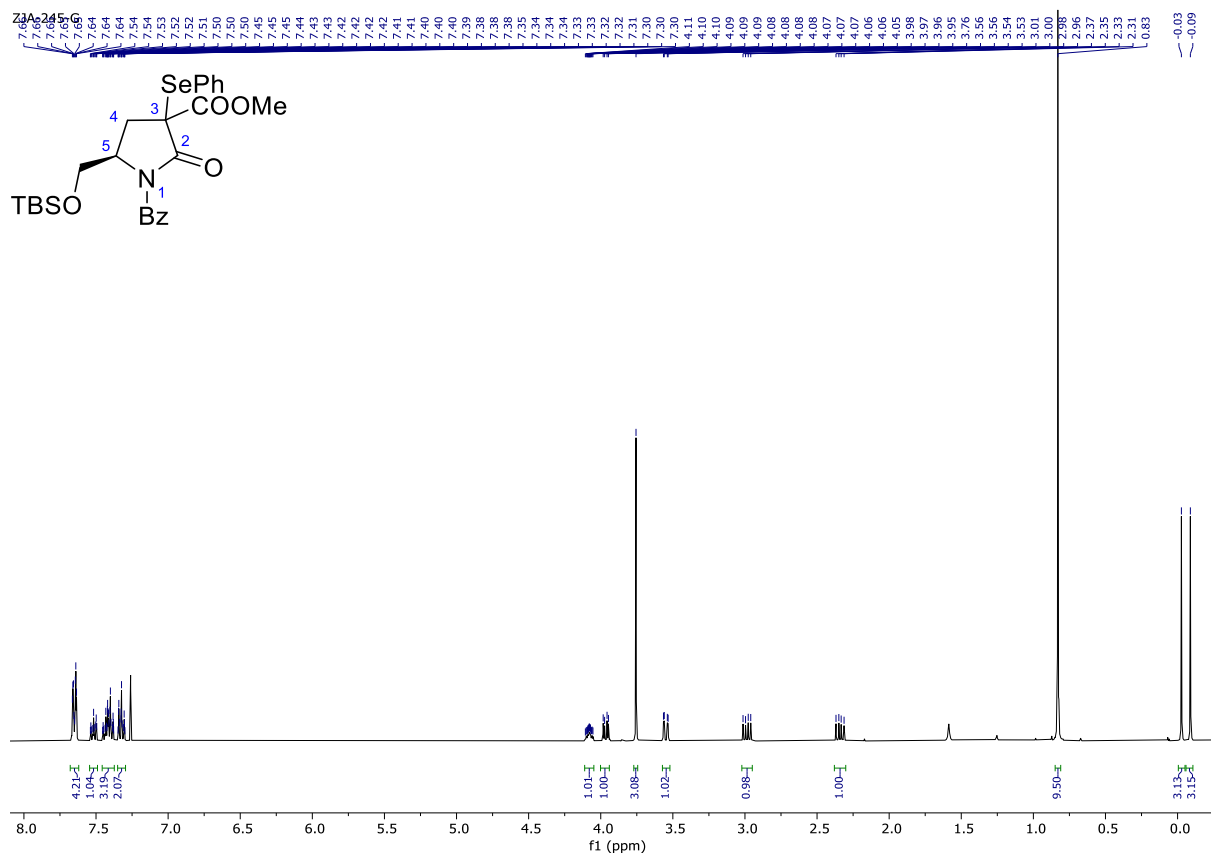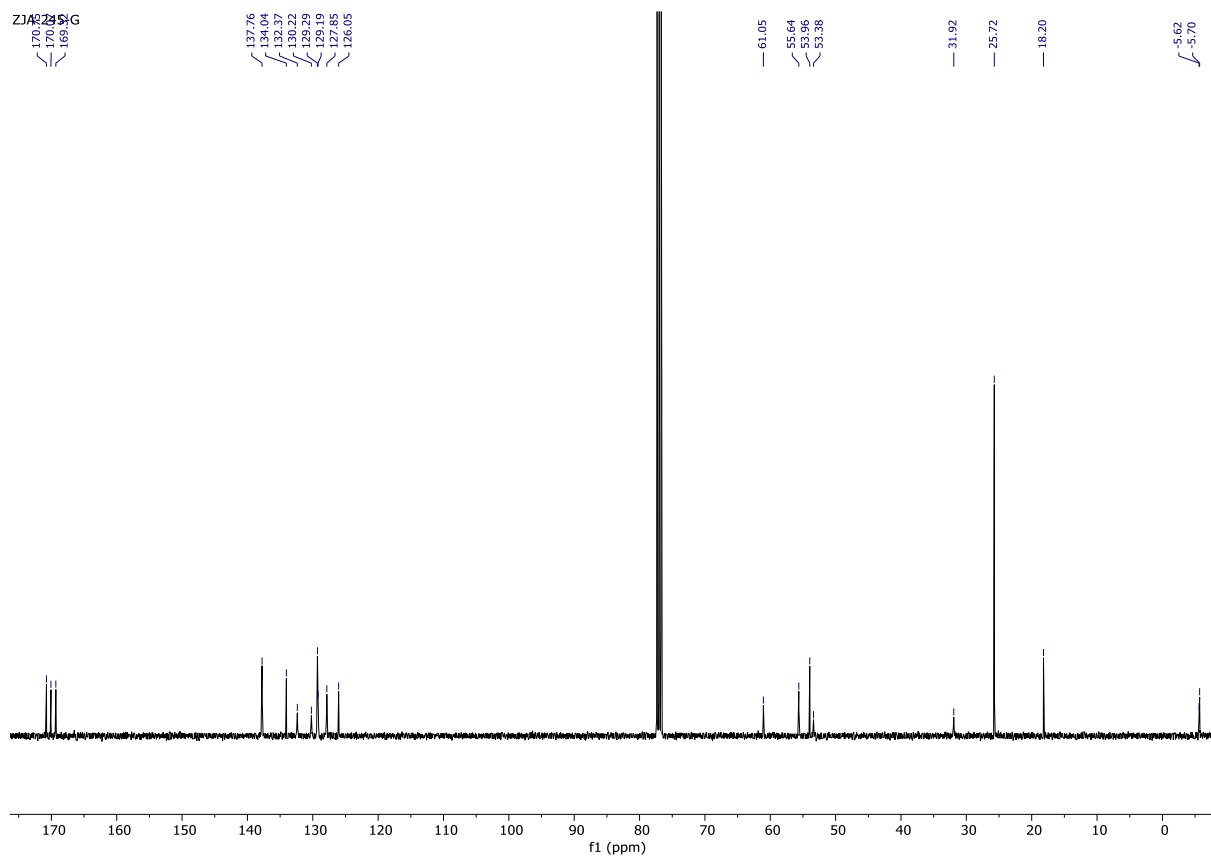

# 13-minor

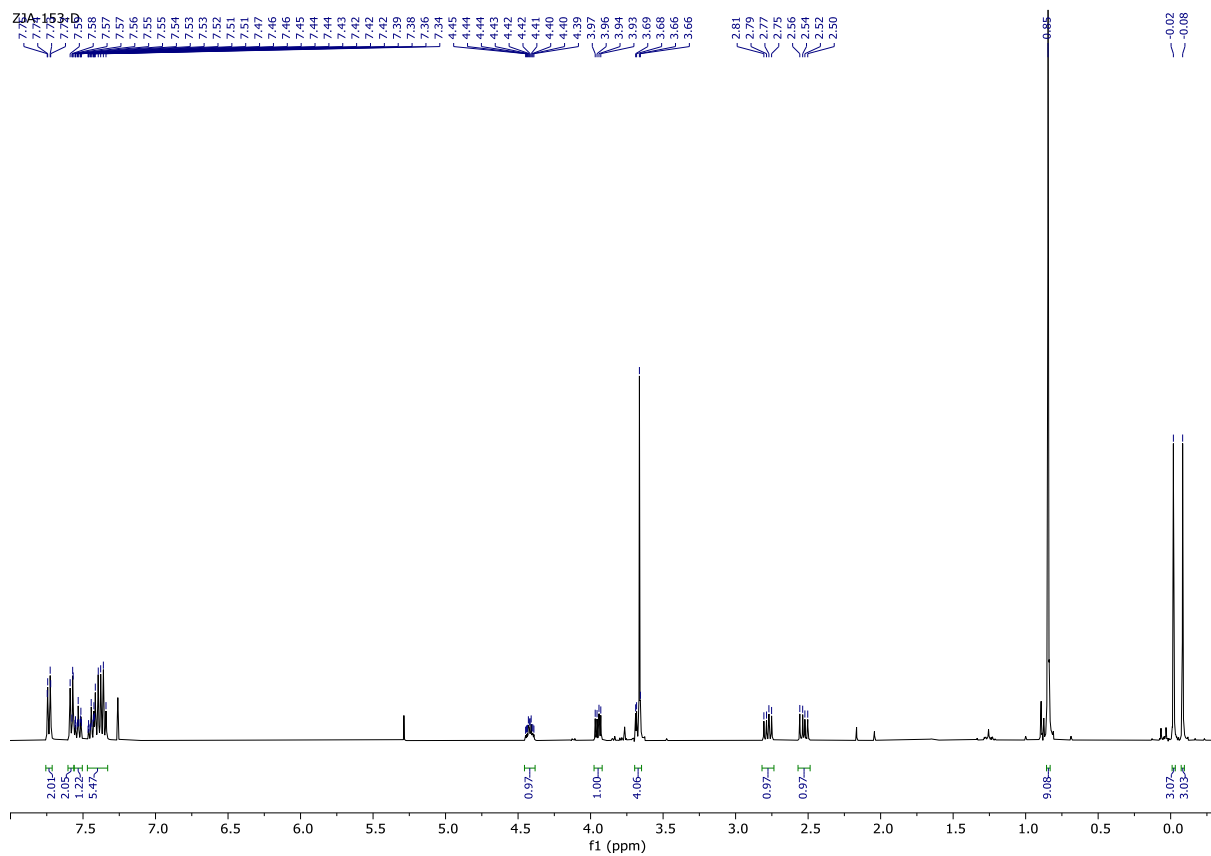

ZJA-153-D  
Perlikova Experiment

137.95  
133.88  
132.67  
129.98  
128.57  
128.12  
127.88  
126.27

60.72  
56.51  
54.36  
53.53

32.24

25.87

18.25

-5.46  
-5.60

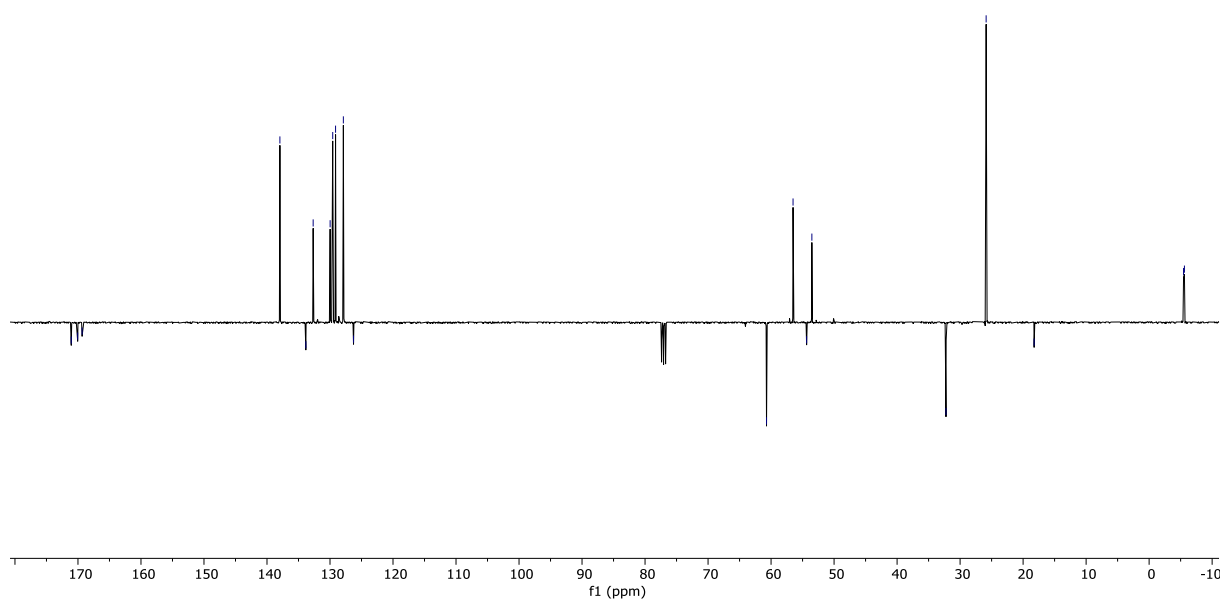



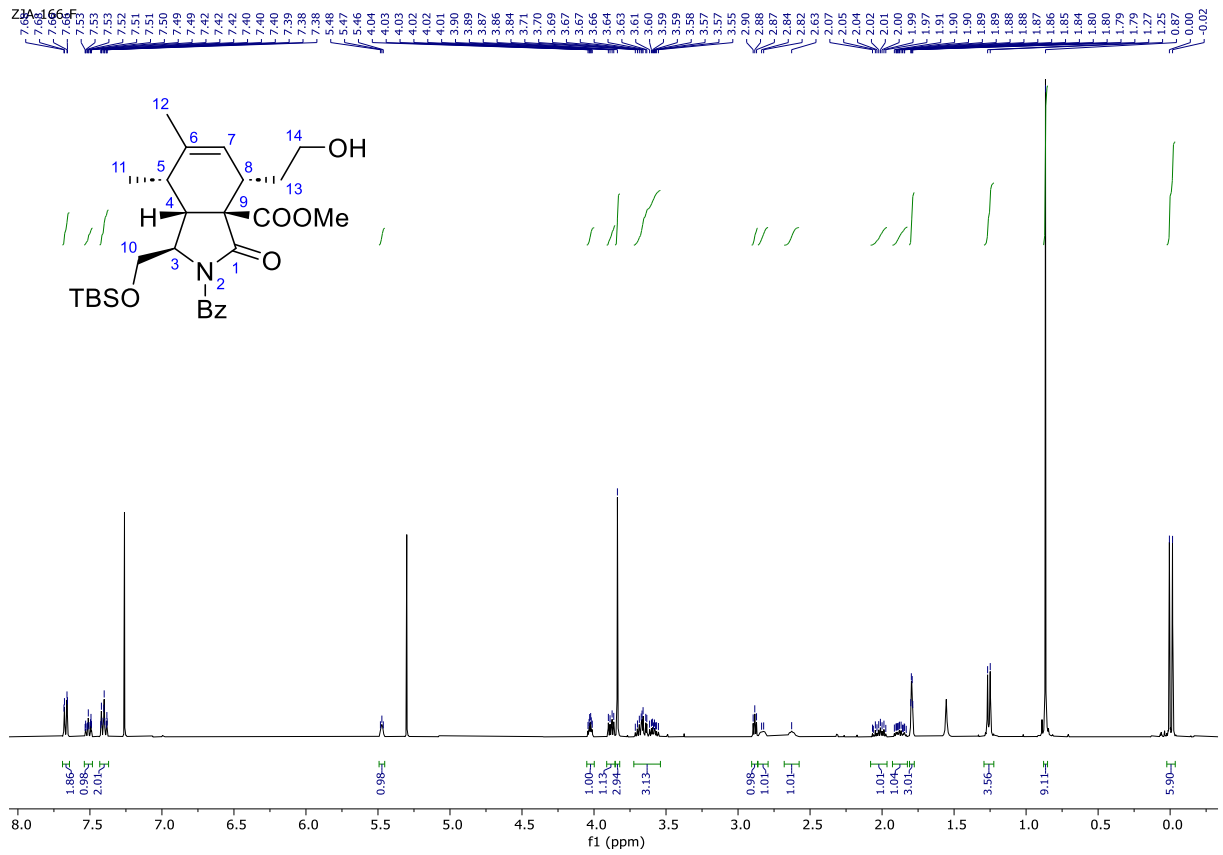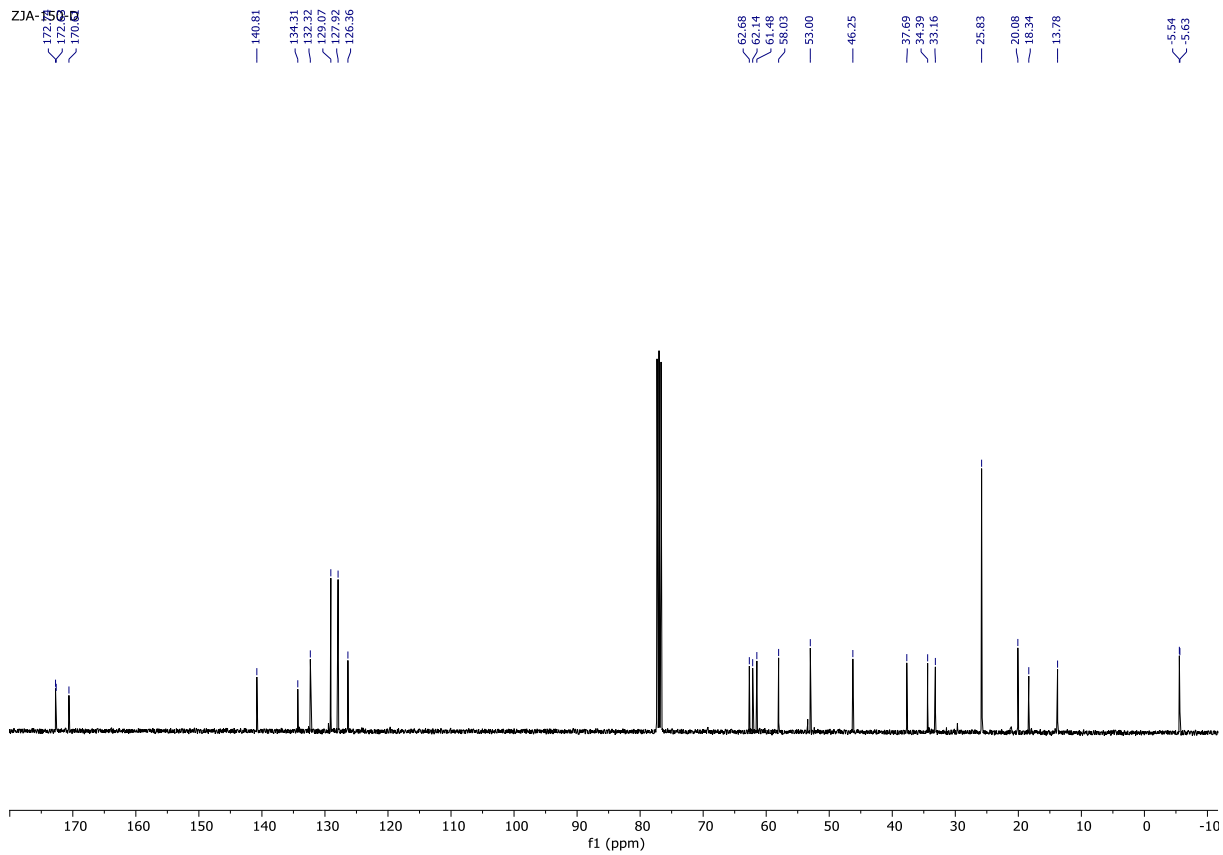

# ROESY

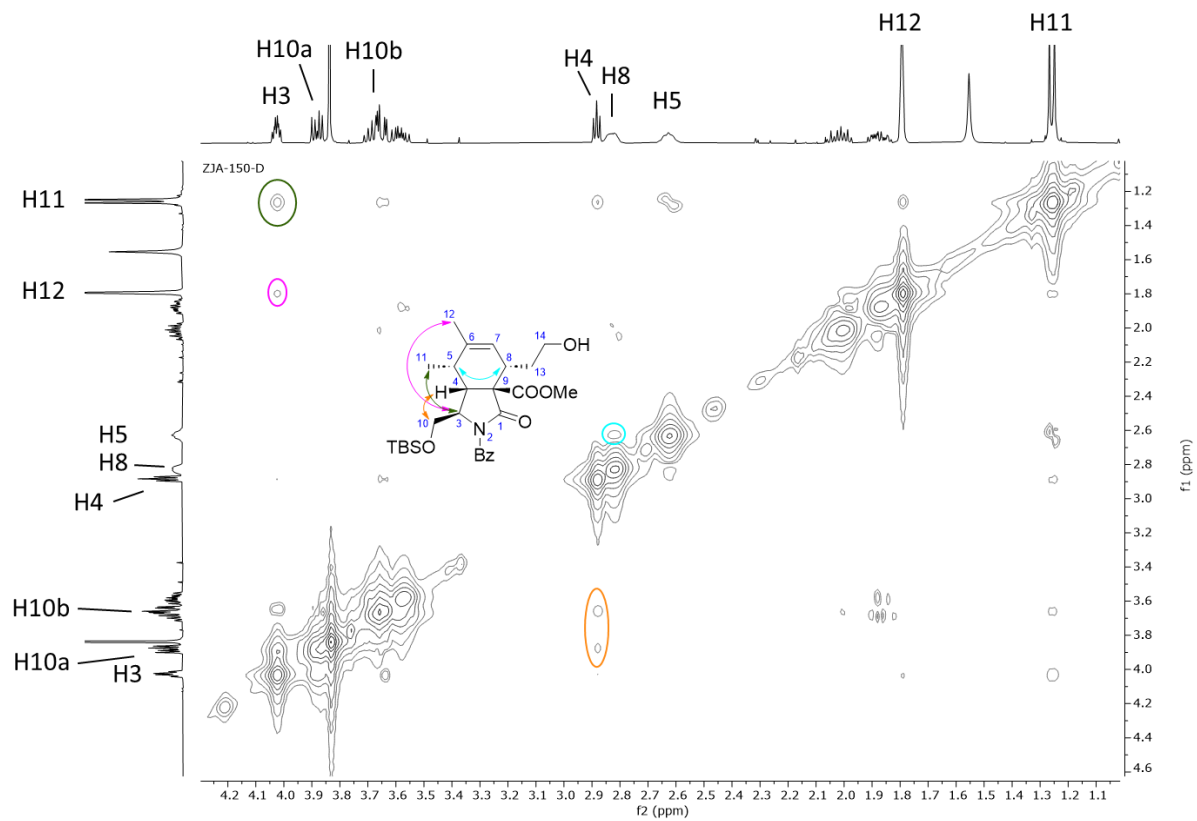

16'

ZJA-166  
Perlikova single pulse

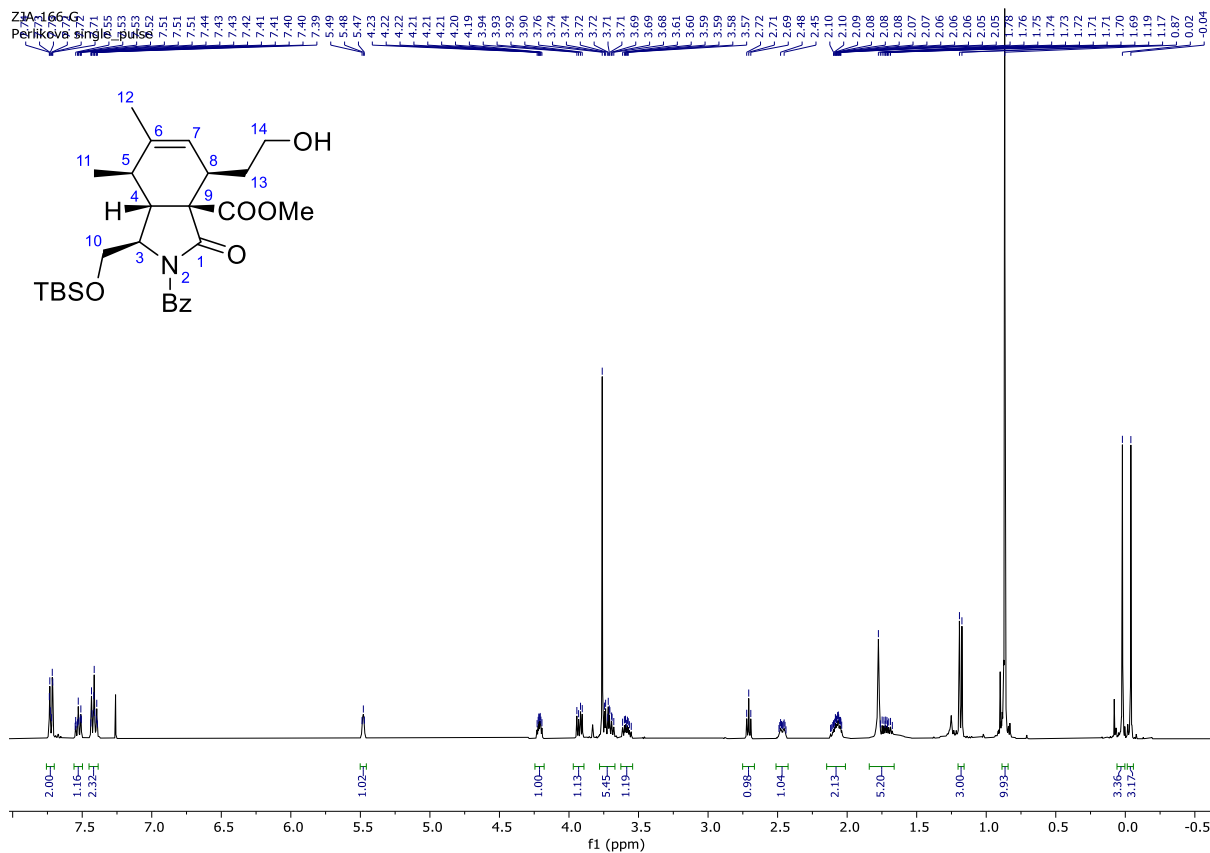

ZJA-166  
Perlikova single pulse decoupled gated NOE

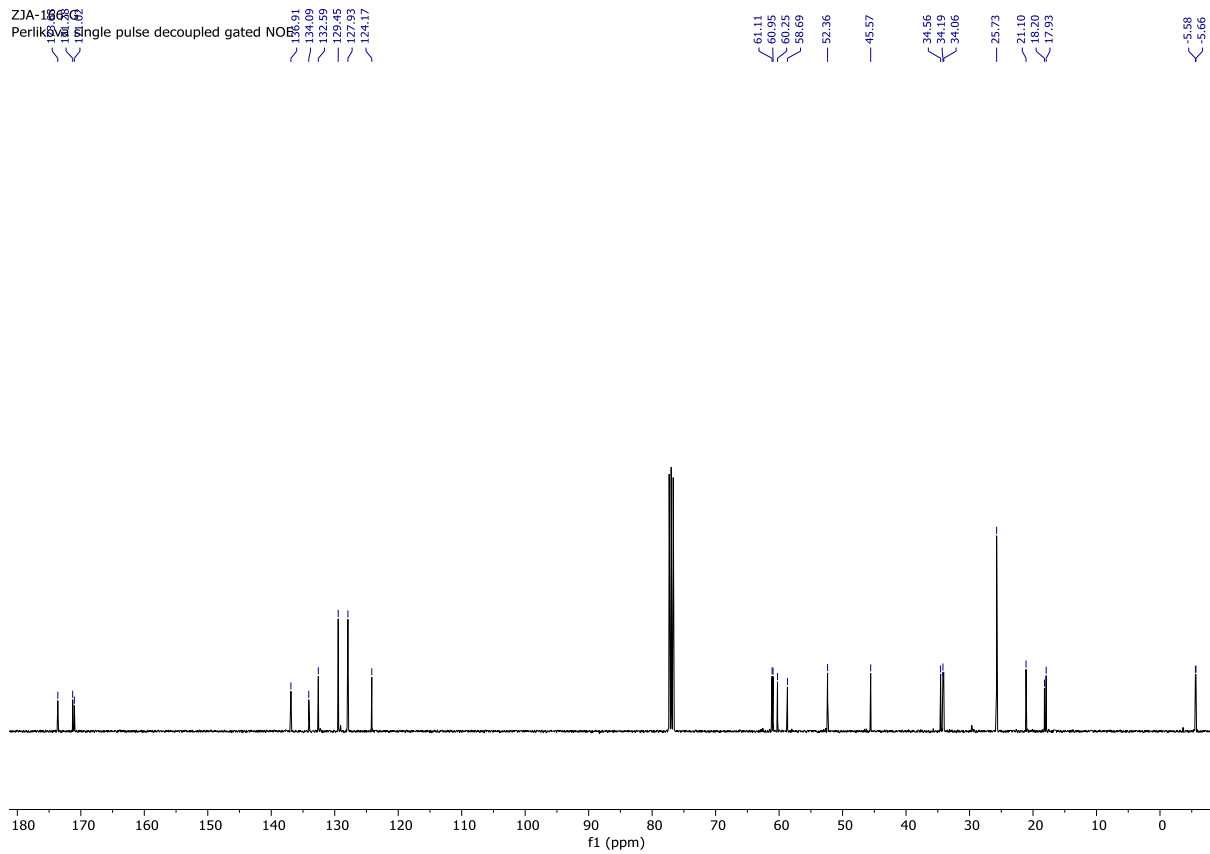

# ROESY

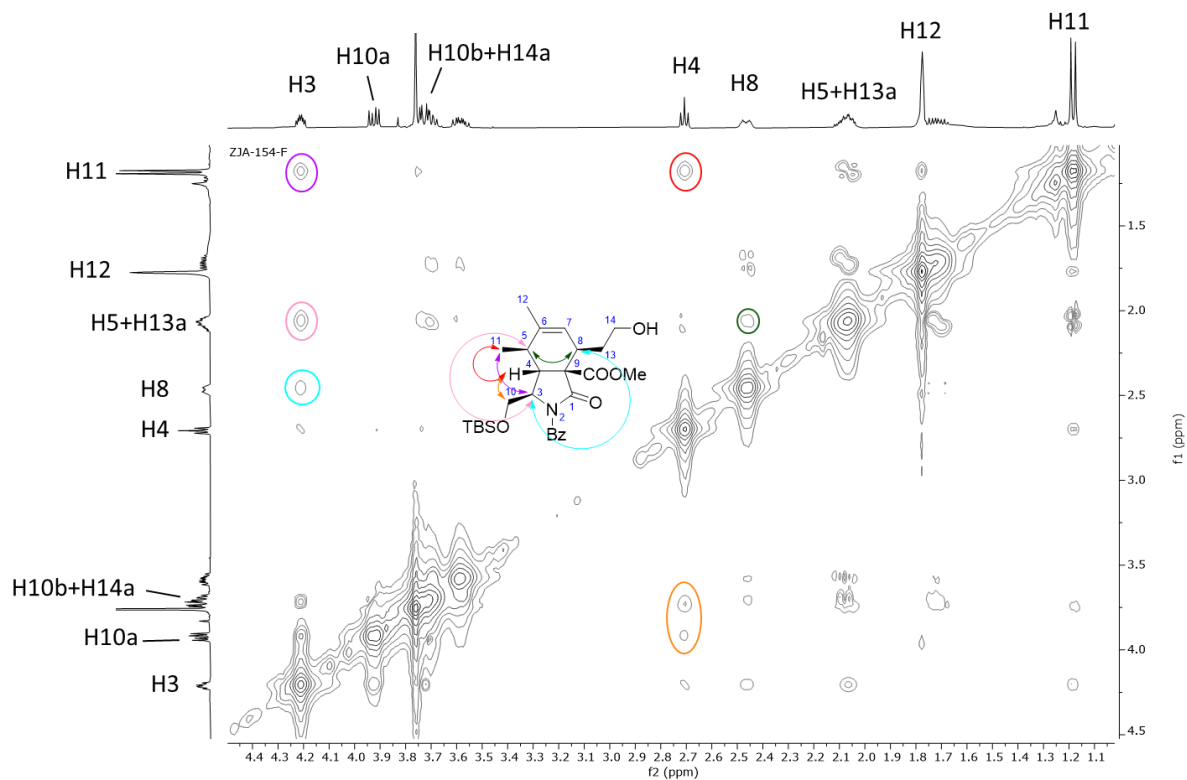

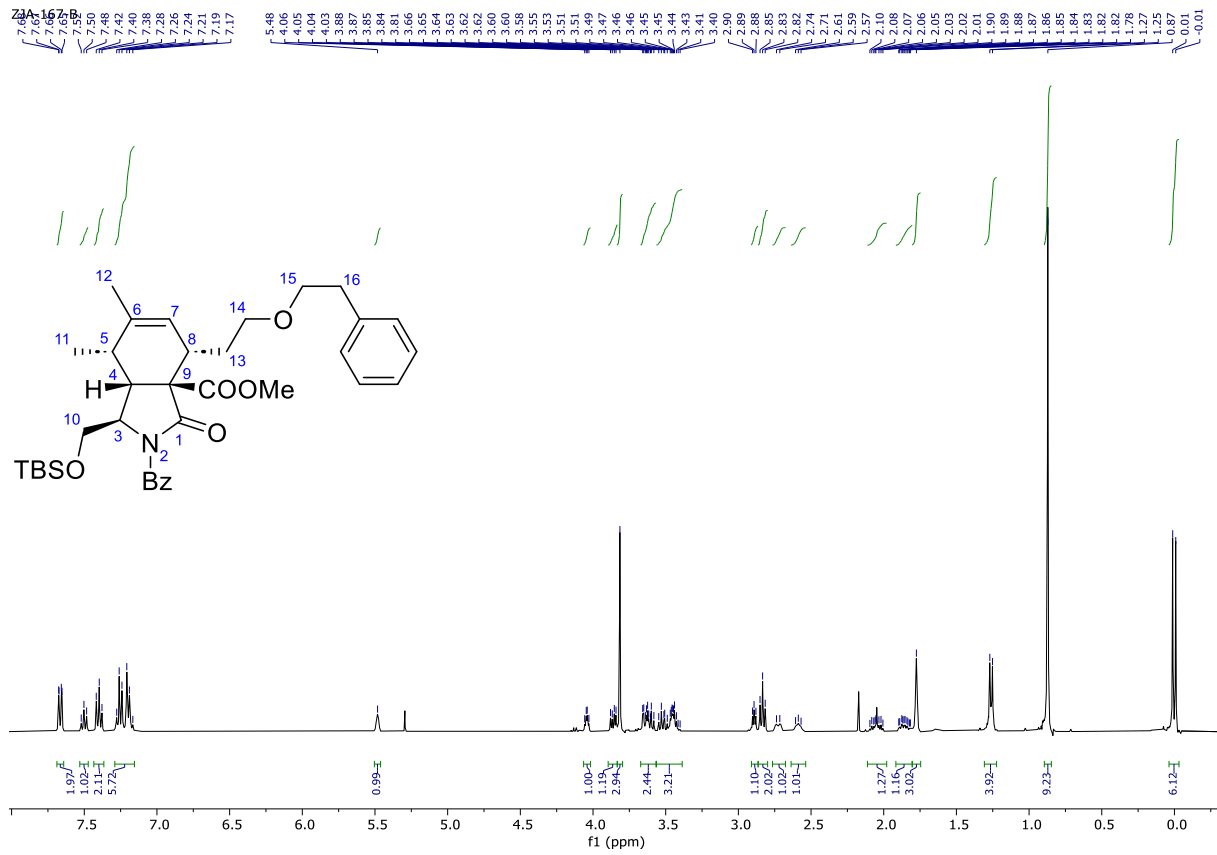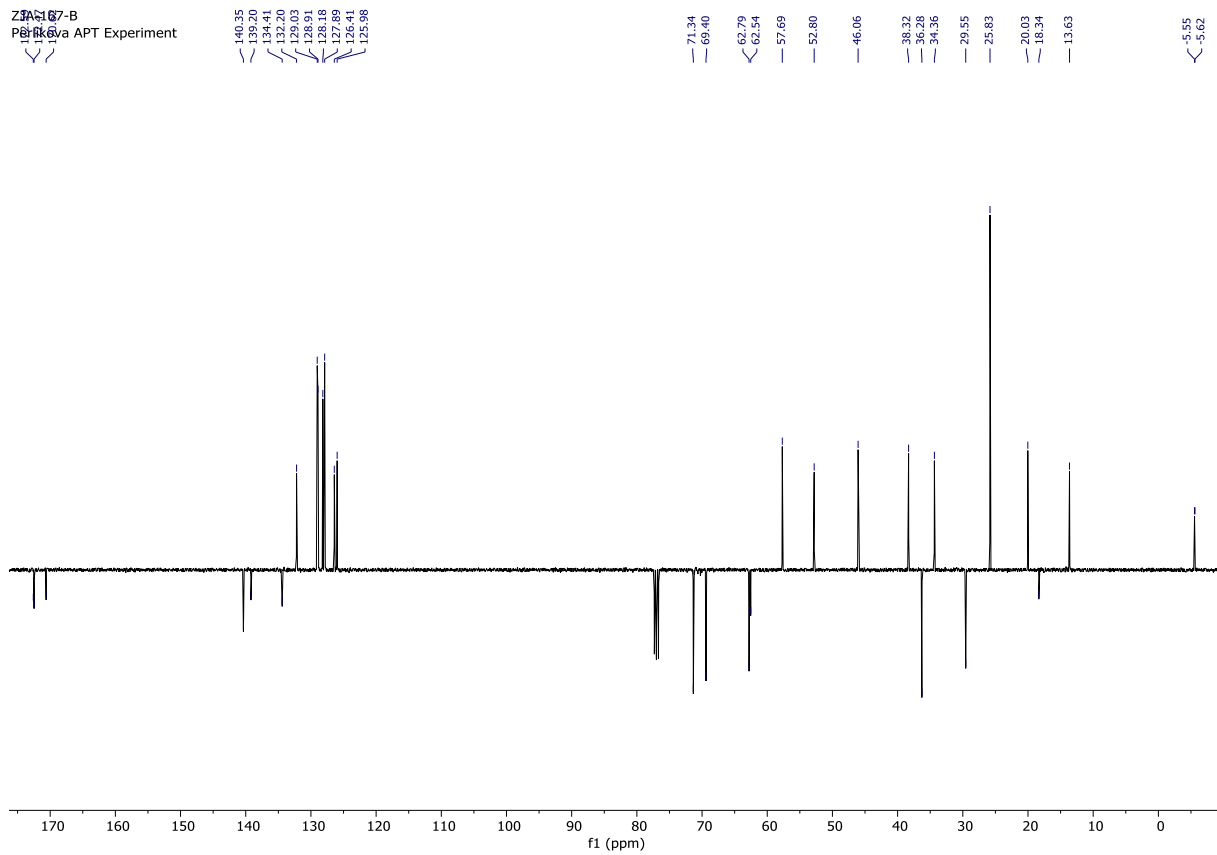

ZJA-202-B  
Perlickova single pulse

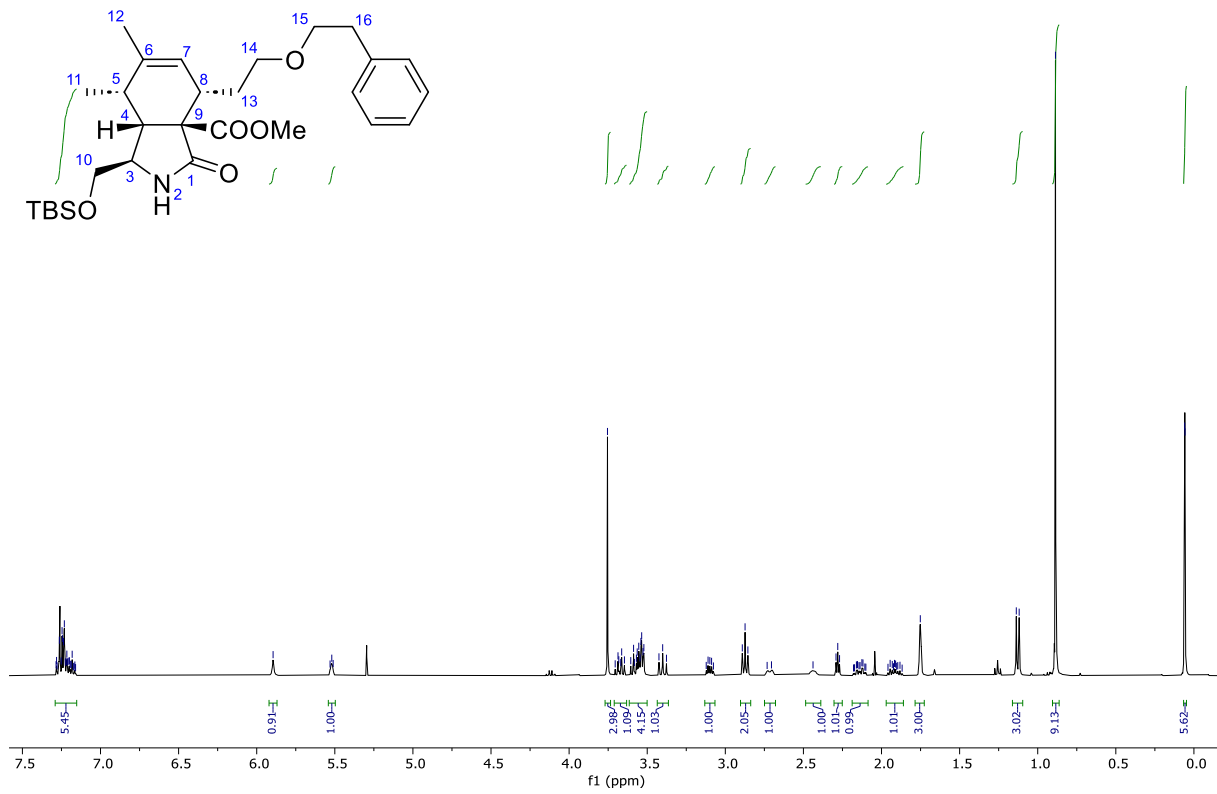

ZJA-202-B  
Perlickova single pulse decoupled gated 300 MHz

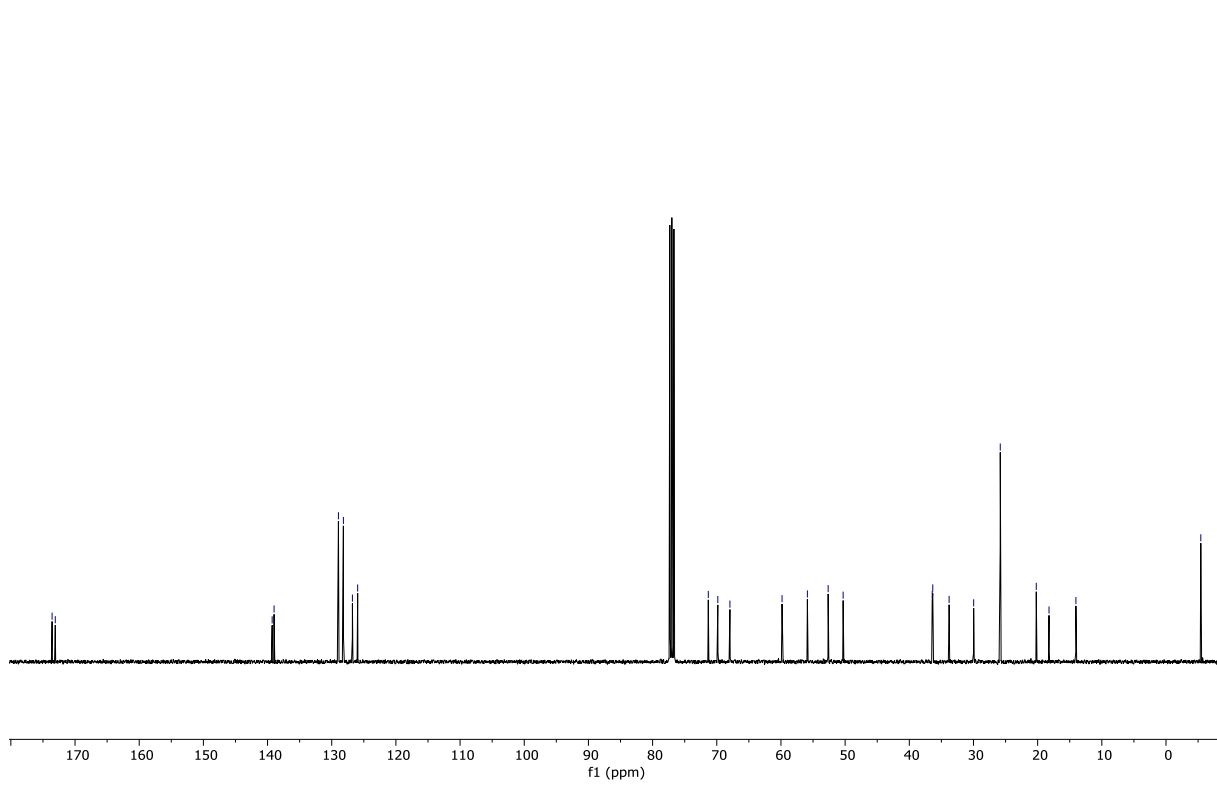

19

ZJARI 75-A  
Perlikova single pulse

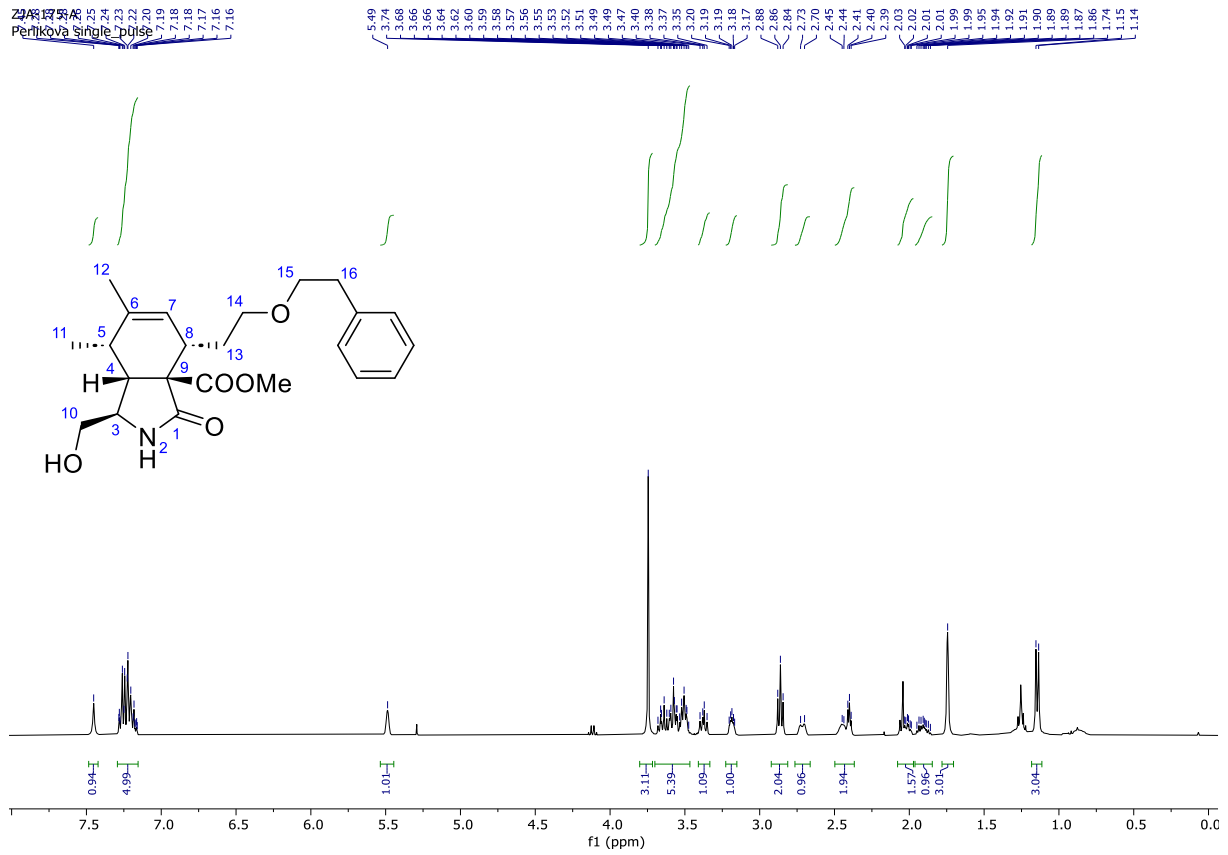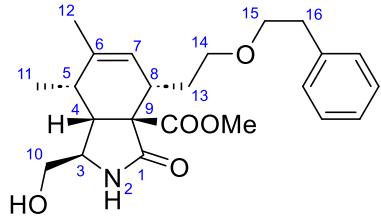

ZJARI 75-A  
Perlikova single pulse decoupled gated

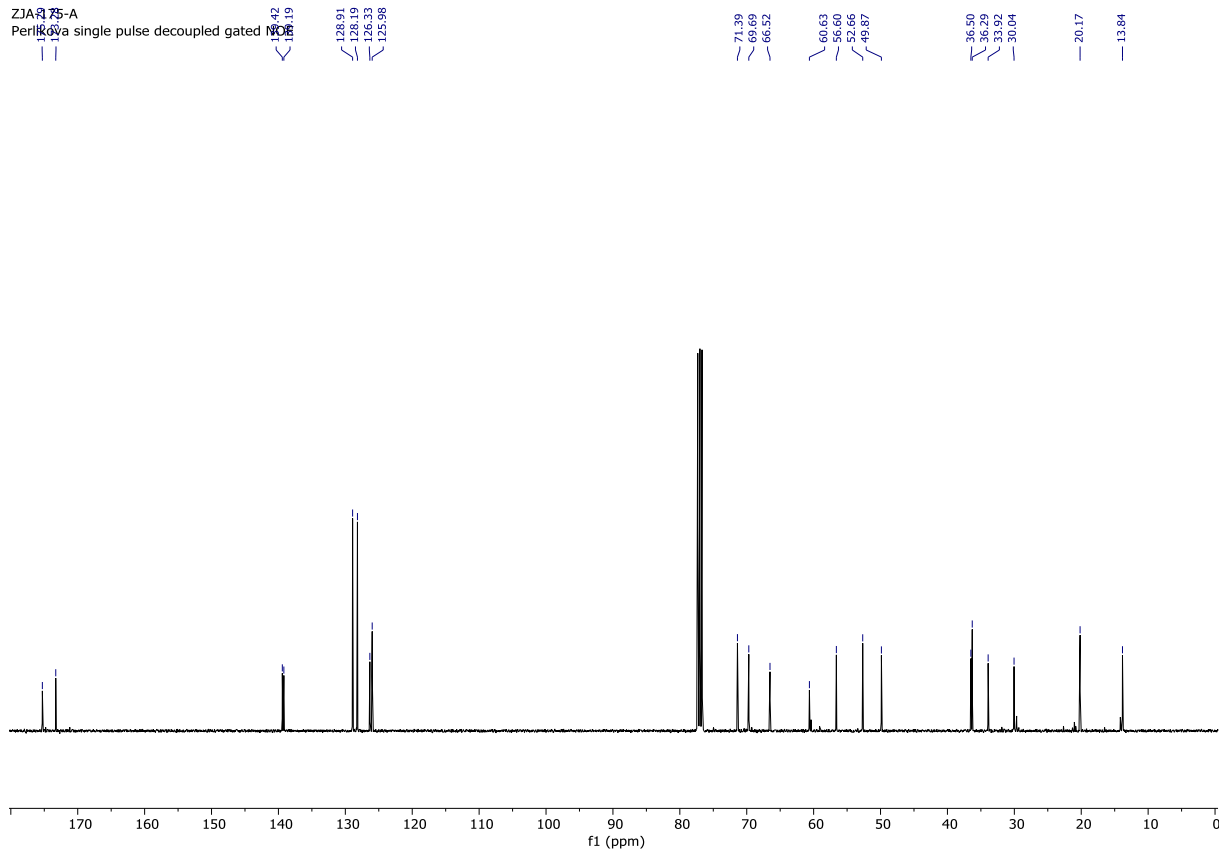

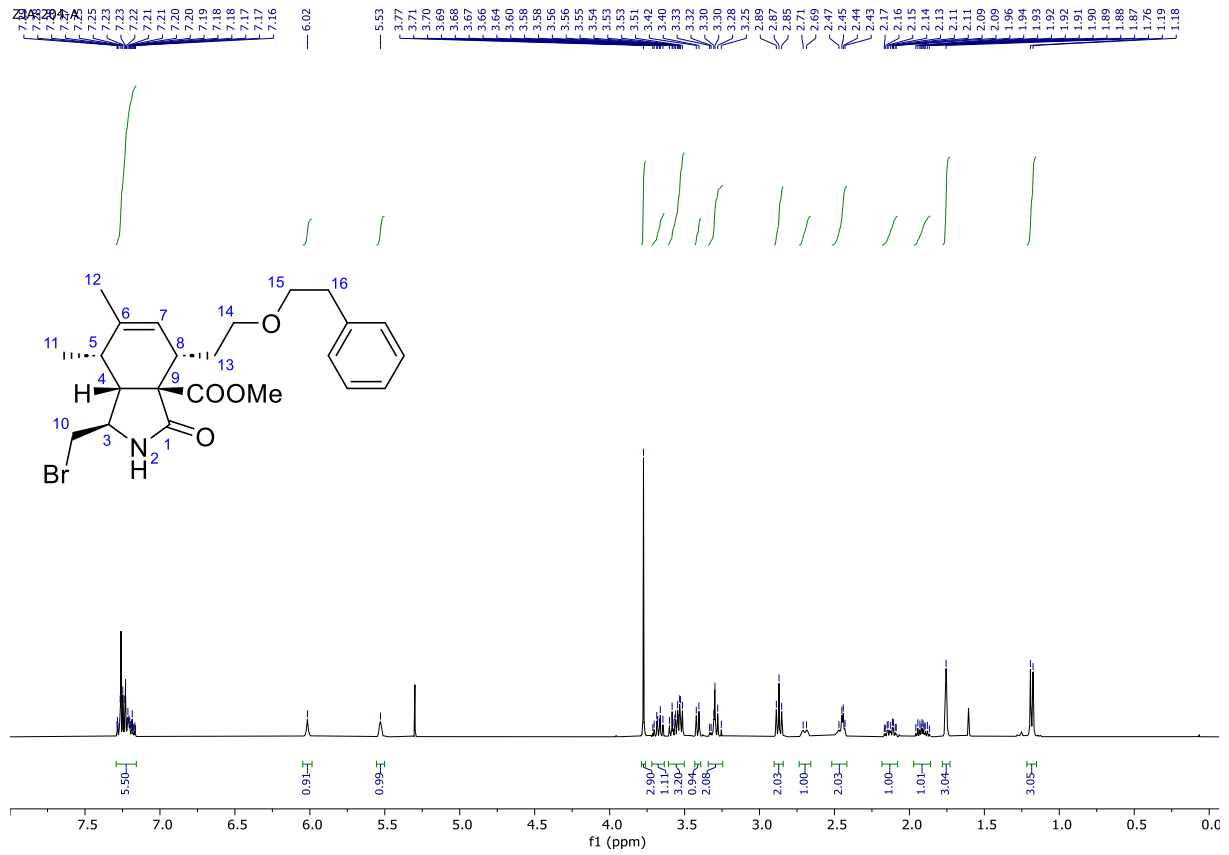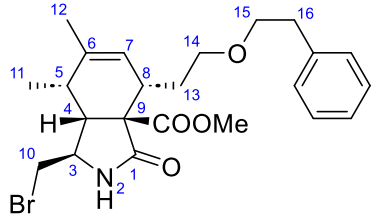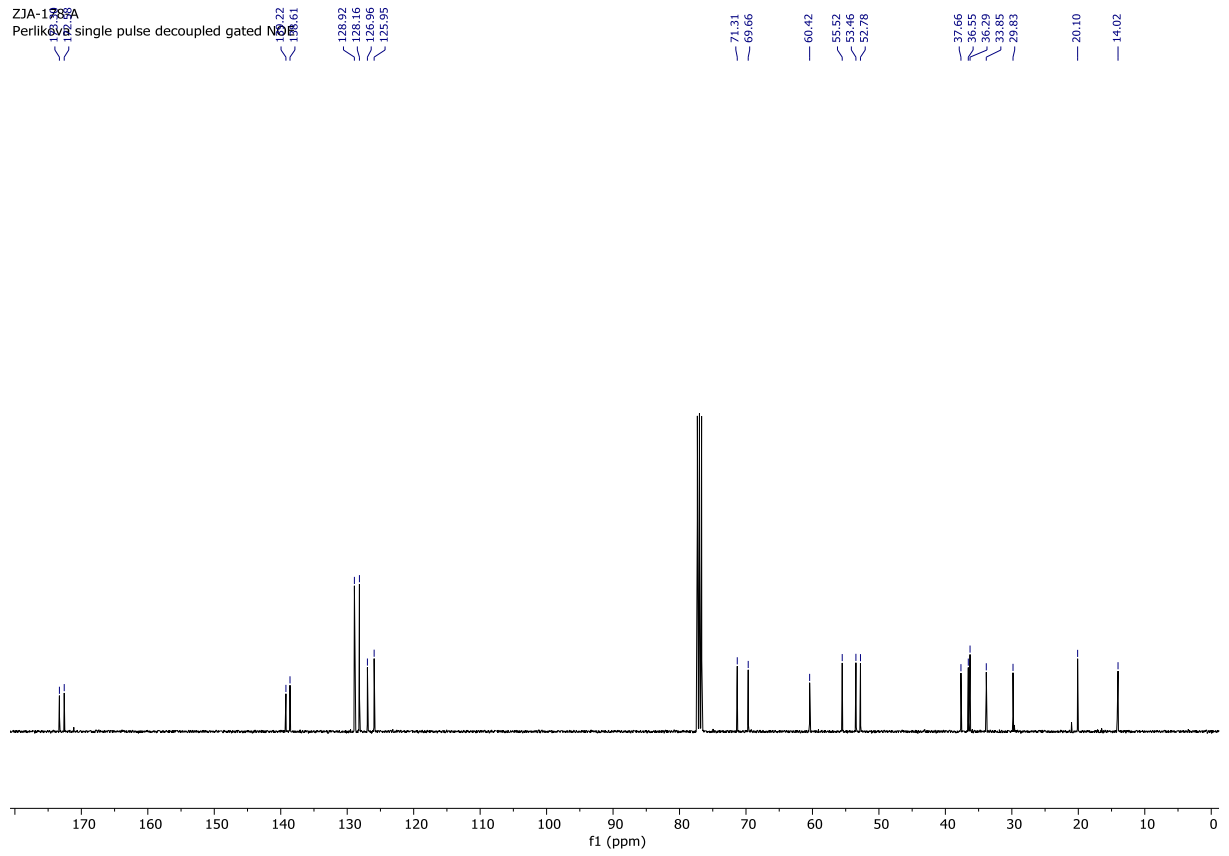



21

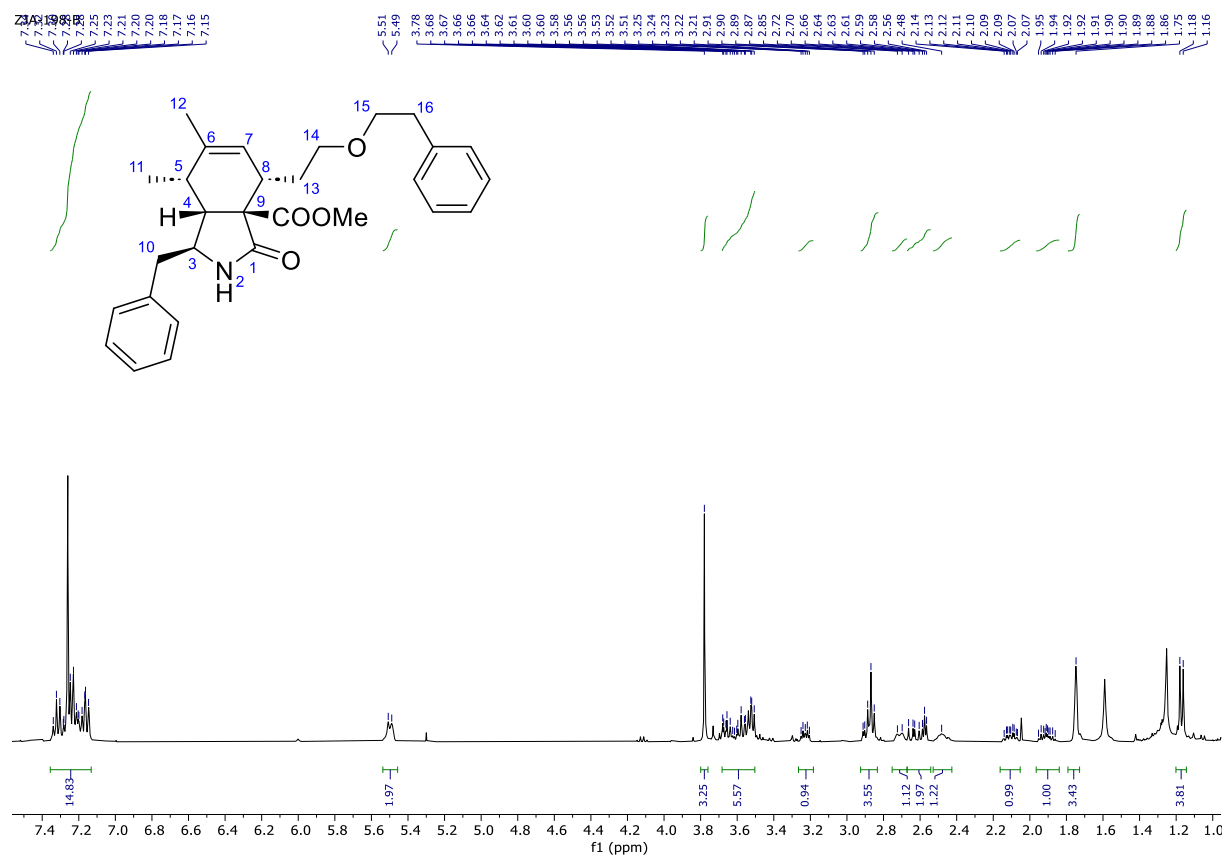

ZJA-2174-2  
Perlikova Single pulse

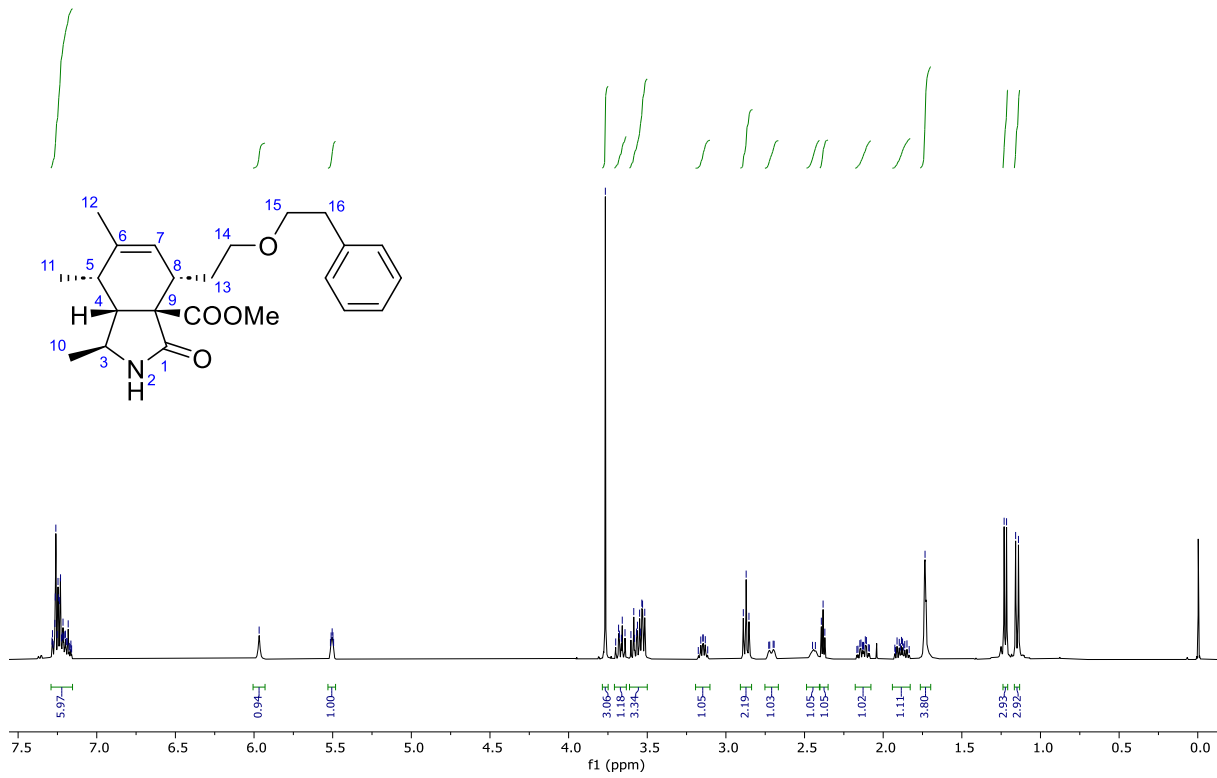

ZJA-2174-2  
Perlikova Single pulse decoupled gated NOE

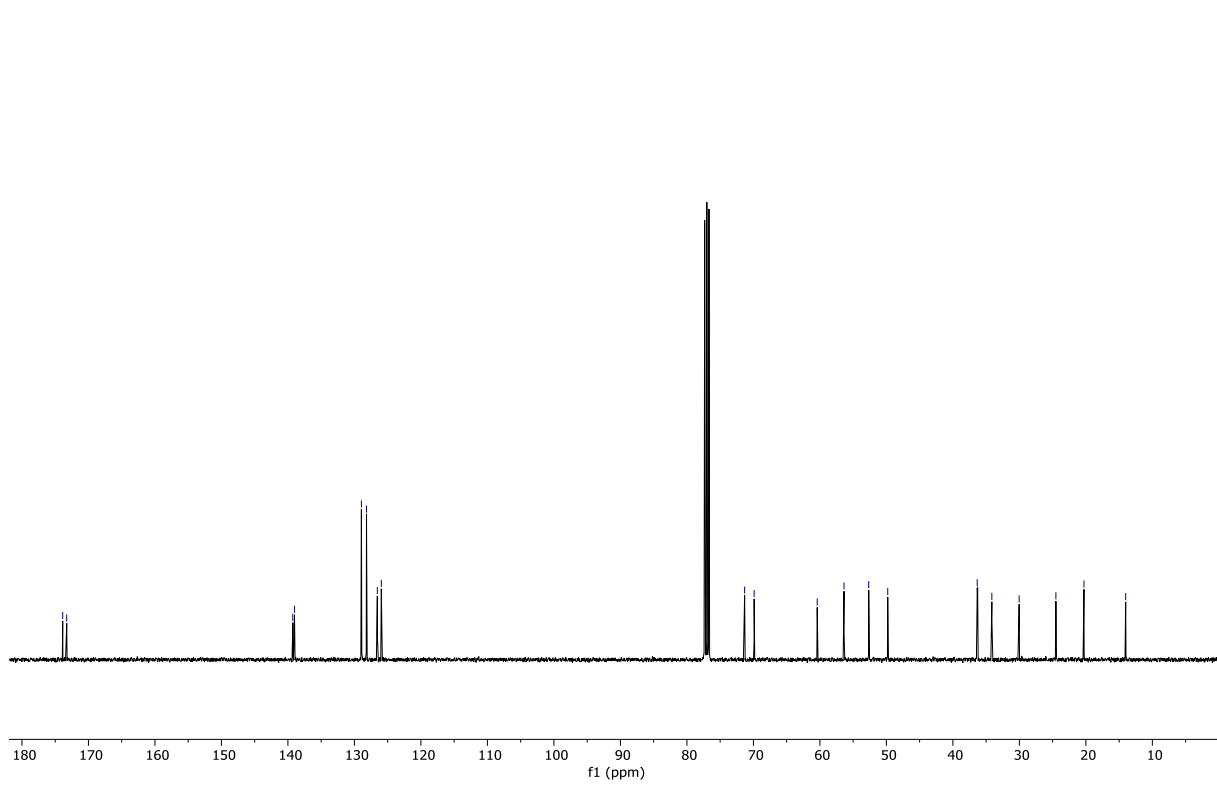

ZJA-221-E  
 7.76, 7.74, 7.72, 7.70, 7.41, 7.40, 7.39, 7.38, 7.37, 7.36, 7.35, 7.34, 7.33, 7.32, 7.31, 7.30, 7.29, 7.28, 7.25, 7.24, 7.23, 7.21, 7.20, 7.19, 7.17, 7.17, 7.17, 3.72, 3.72, 3.66, 3.64, 3.63, 3.63, 3.61, 3.57, 3.54, 3.53, 3.51, 3.49, 3.48, 3.47, 3.46, 3.18, 3.17, 3.15, 3.14, 2.86, 2.84, 2.83, 2.82, 2.78, 2.77, 2.58, 2.54, 2.52, 2.51, 2.48, 2.31, 2.31, 2.30, 2.29, 2.26, 2.24, 2.08, 1.86, 1.83, 1.81, 1.77, 1.47, 0.50, 0.48

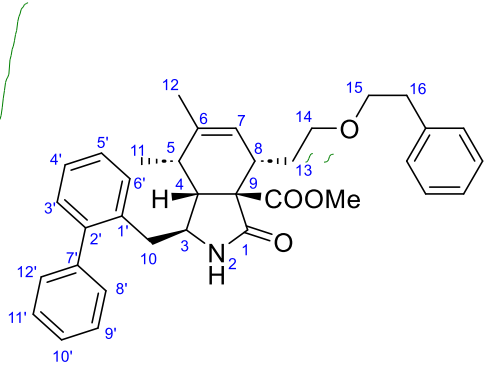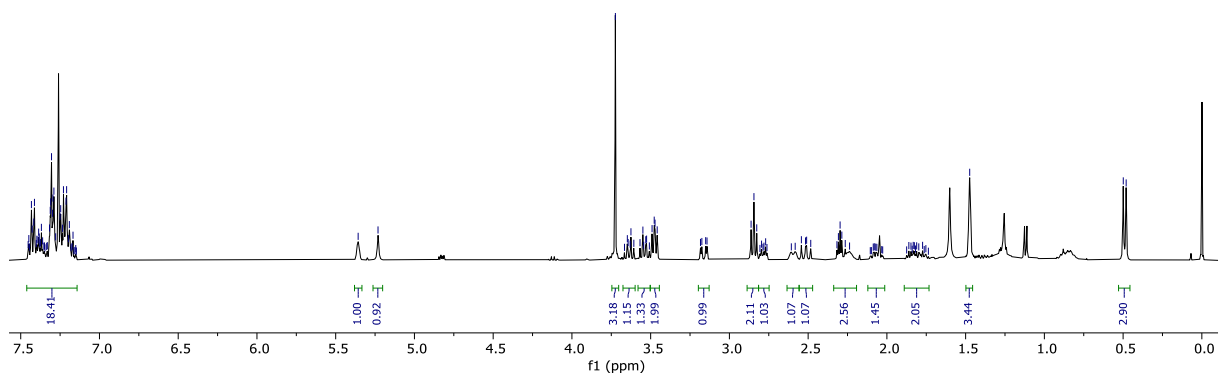

ZJA-221-E  
 Peltova single pulse decoupled  
 162.21, 158.58, 146.36, 138.32, 130.83, 130.75, 129.29, 128.76, 128.76, 128.29, 127.95, 127.39, 127.20, 126.48, 126.06, 71.42, 69.97, 60.27, 54.72, 54.28, 52.79, 42.52, 36.42, 34.11, 29.80, 20.07, 12.97

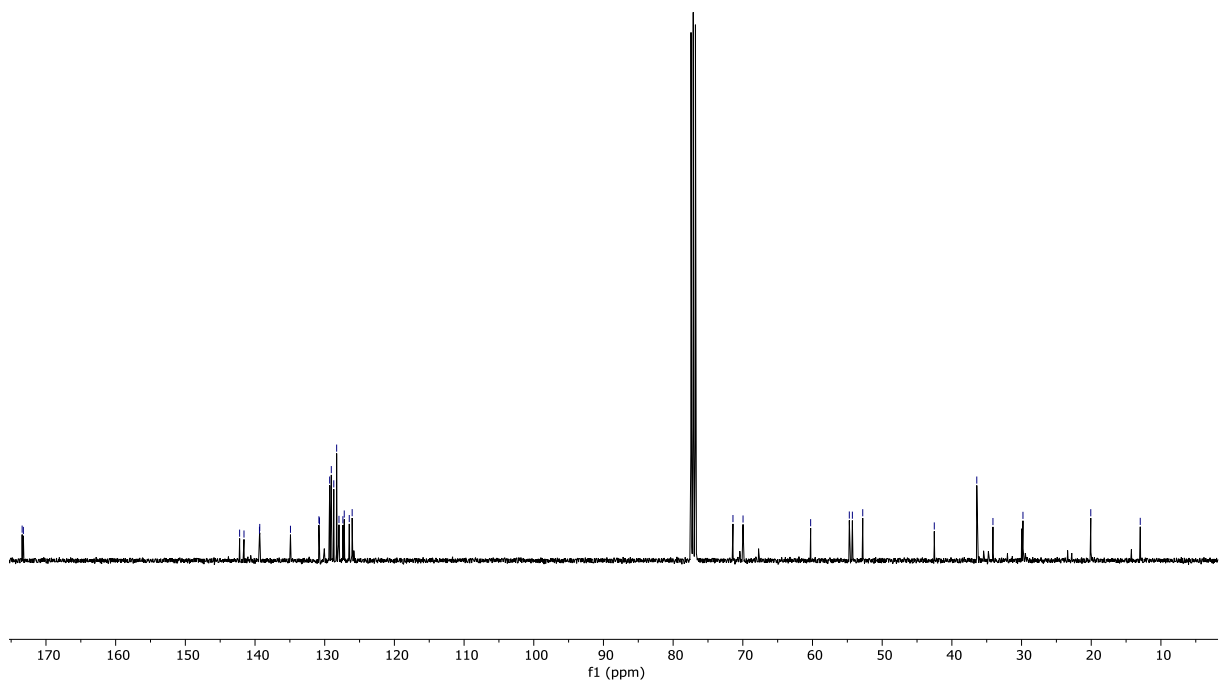

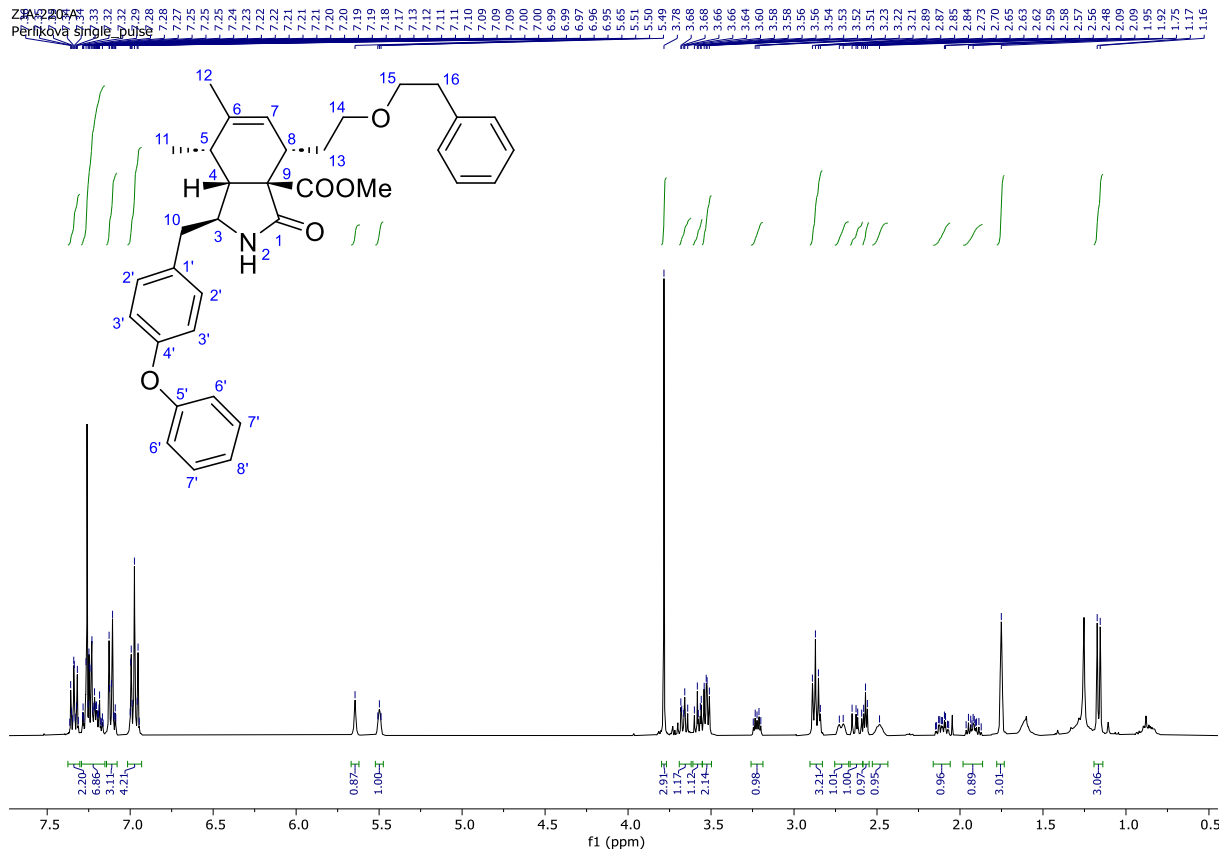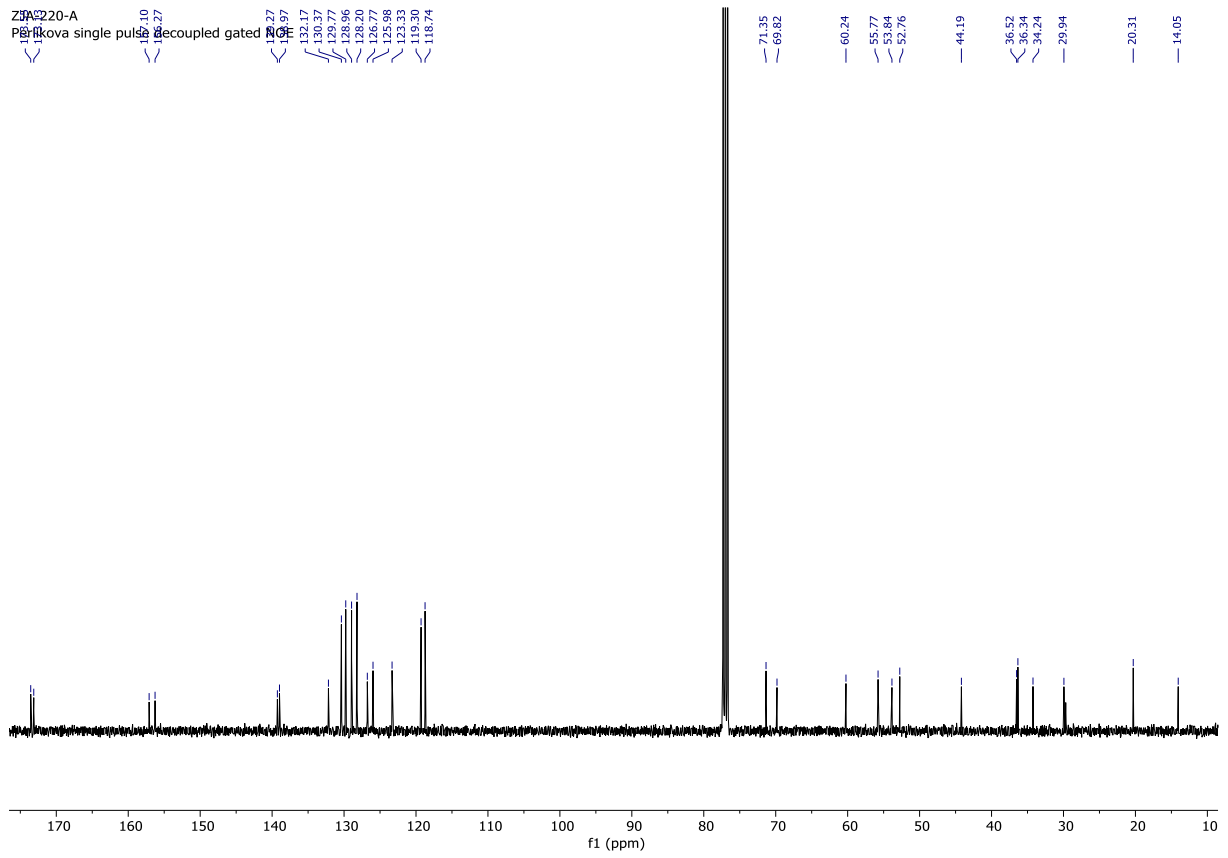

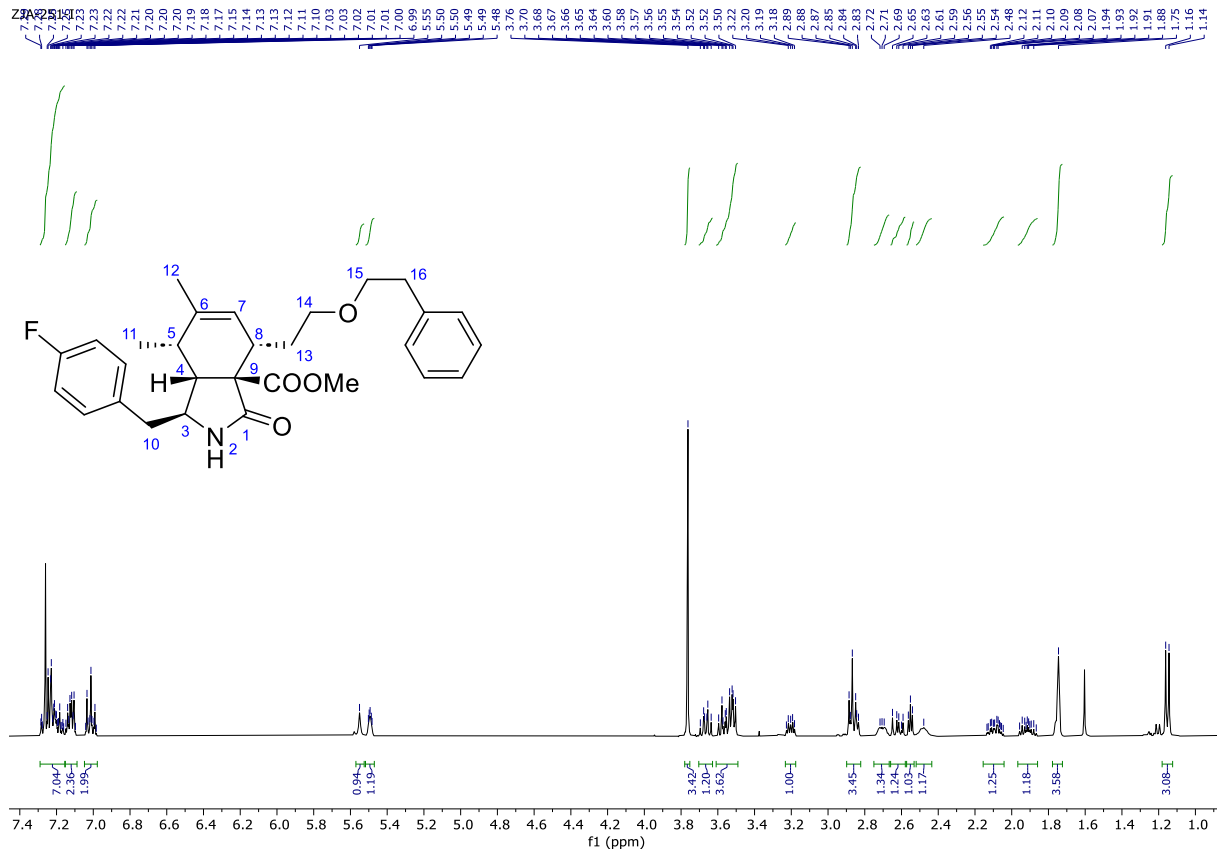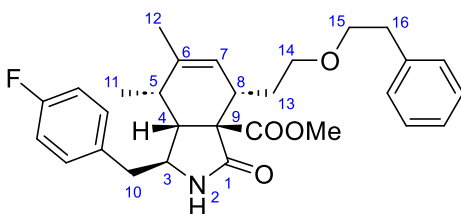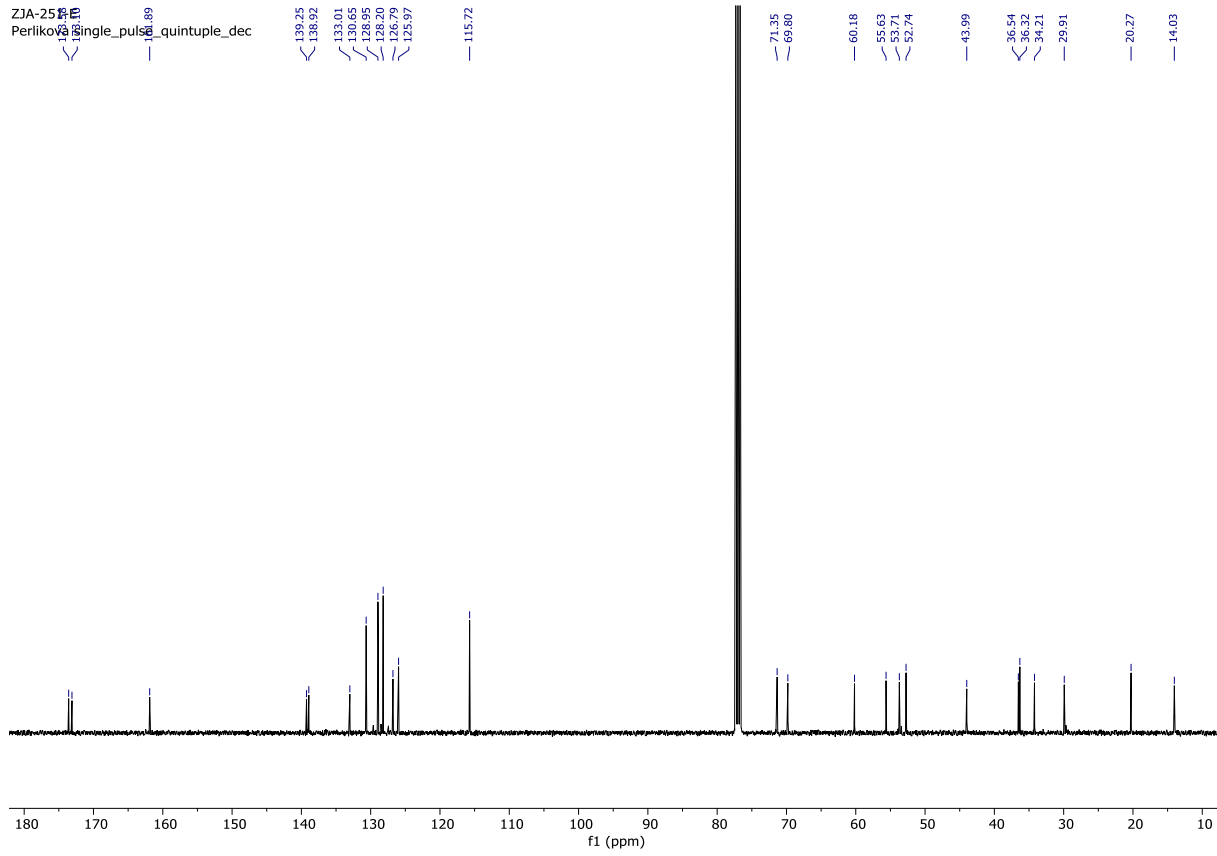

ZJA-251-I  
Perlikova single pulse decoupled gated NOE

80.911

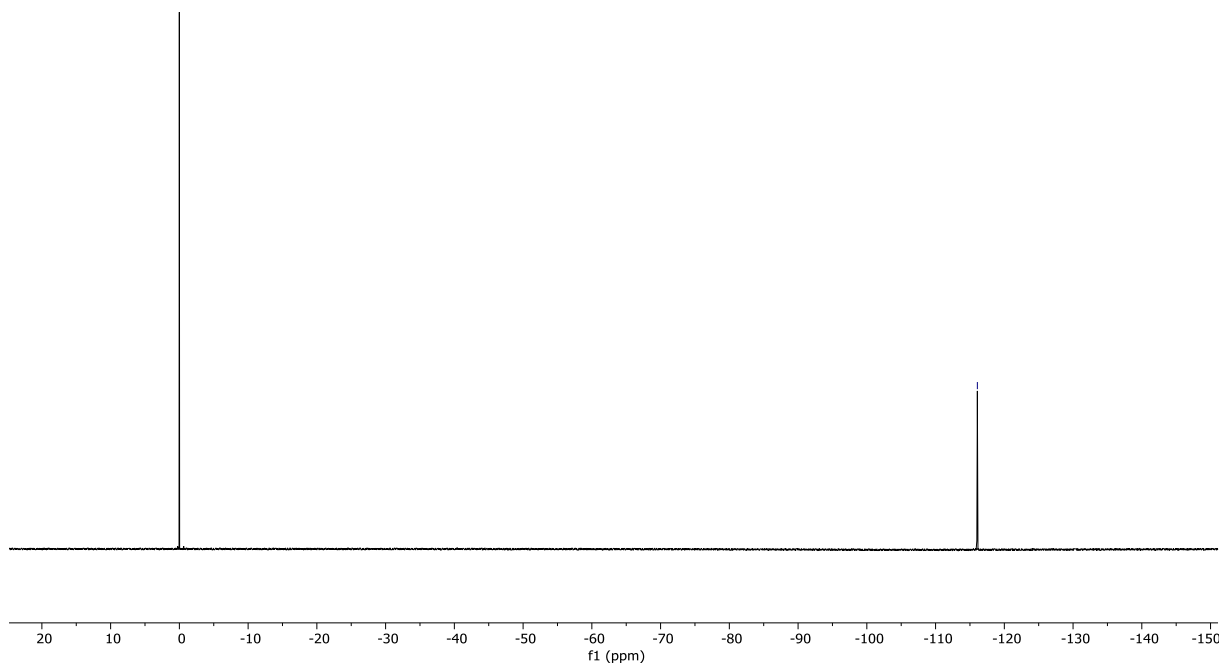

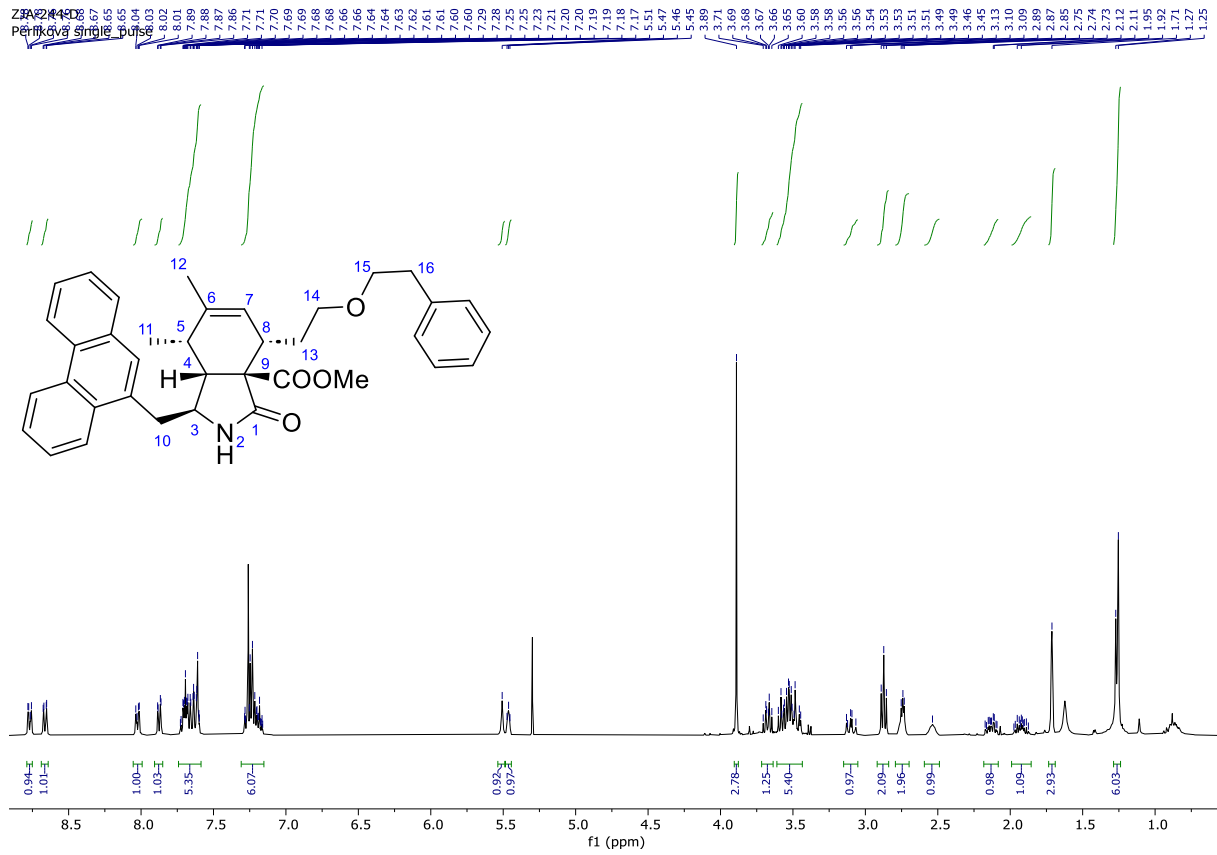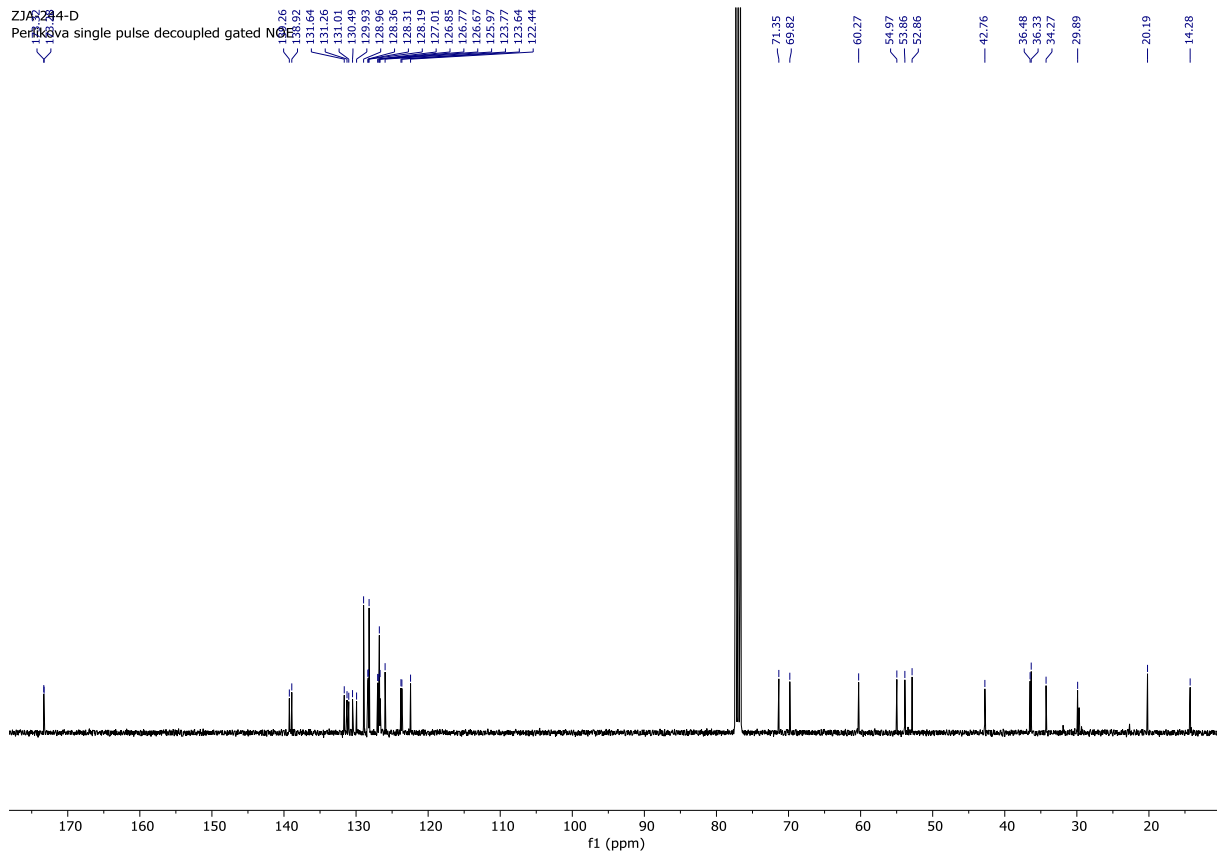

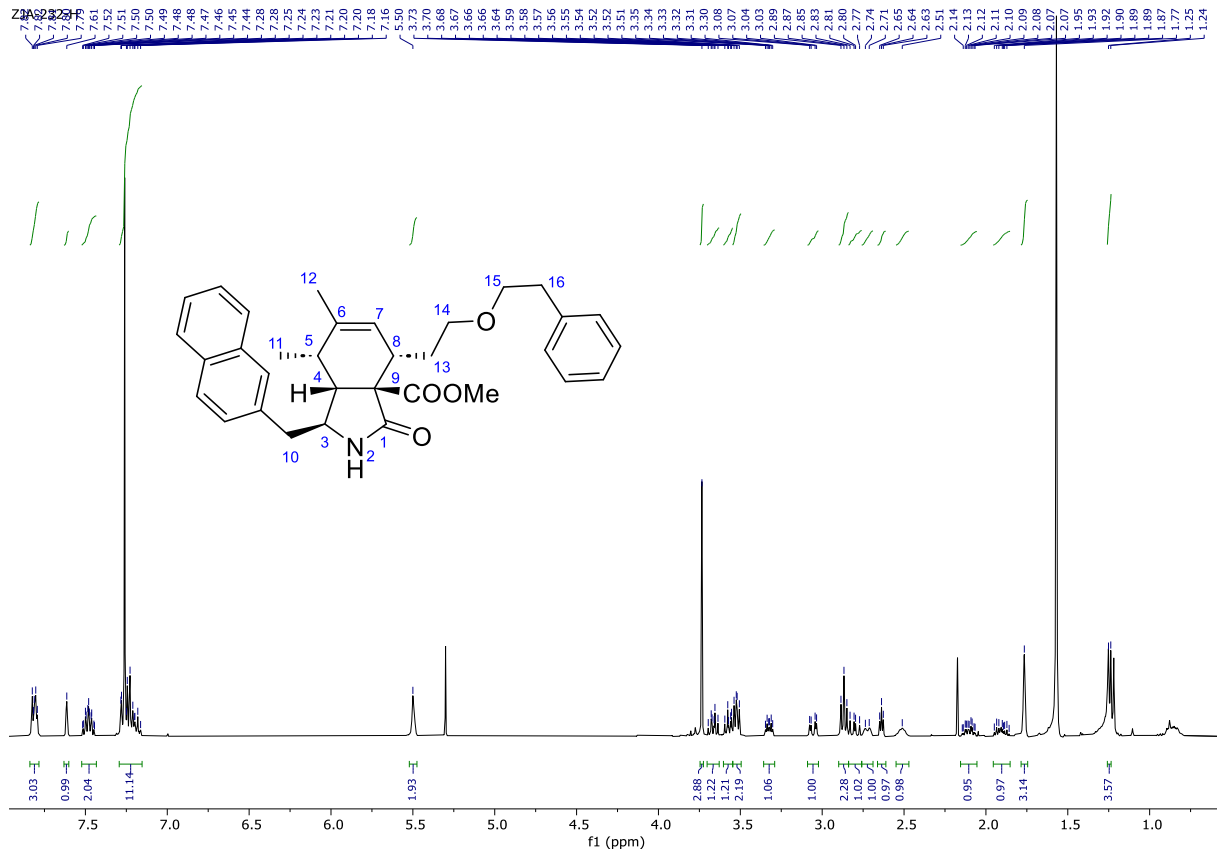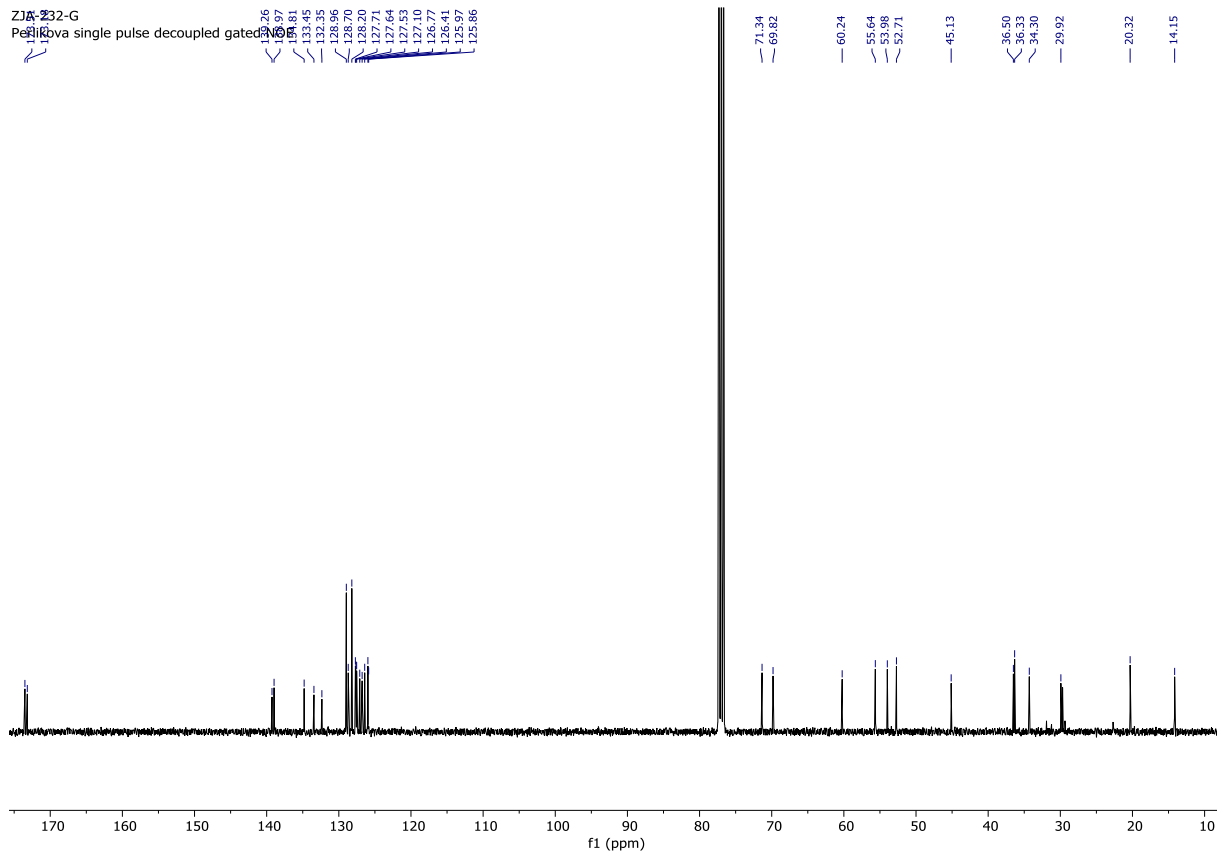



ZJA-252FG  
Perlikova single pulse

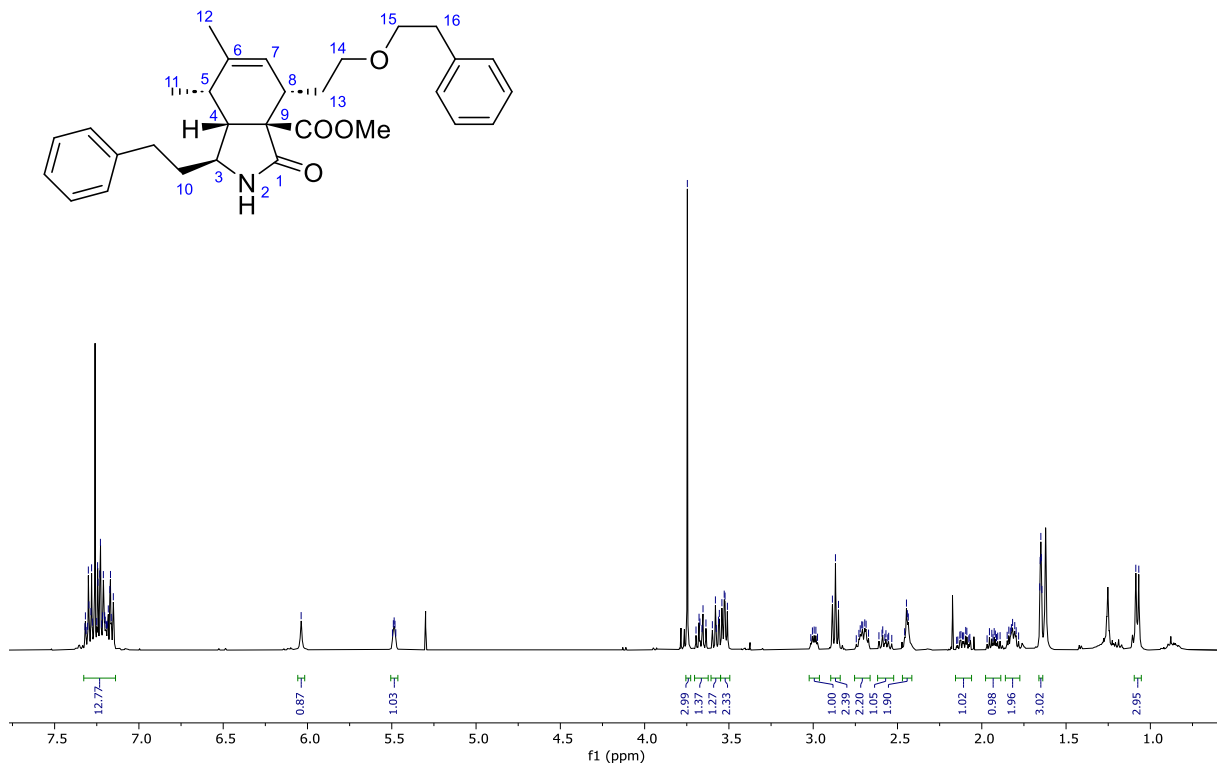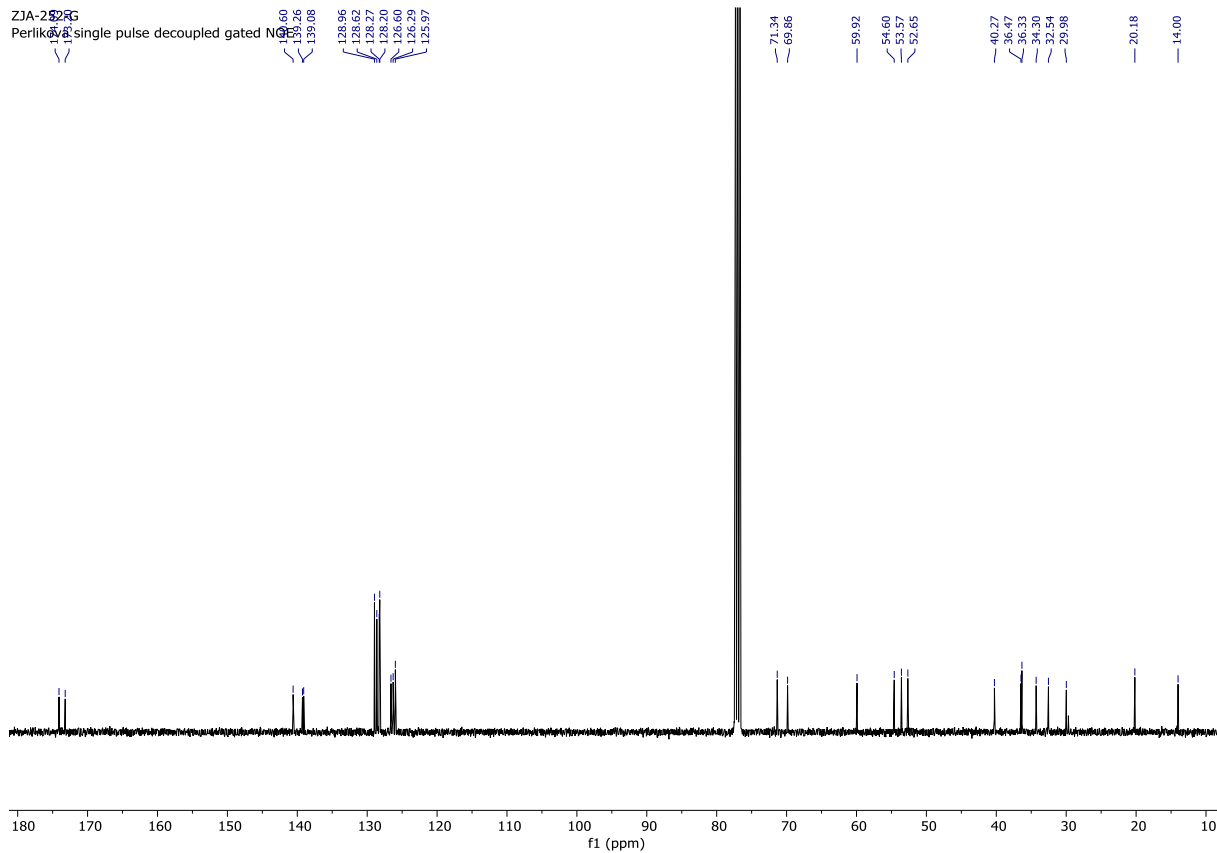

# S1

ZJA-118-B

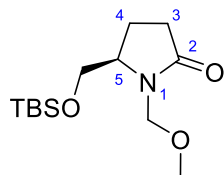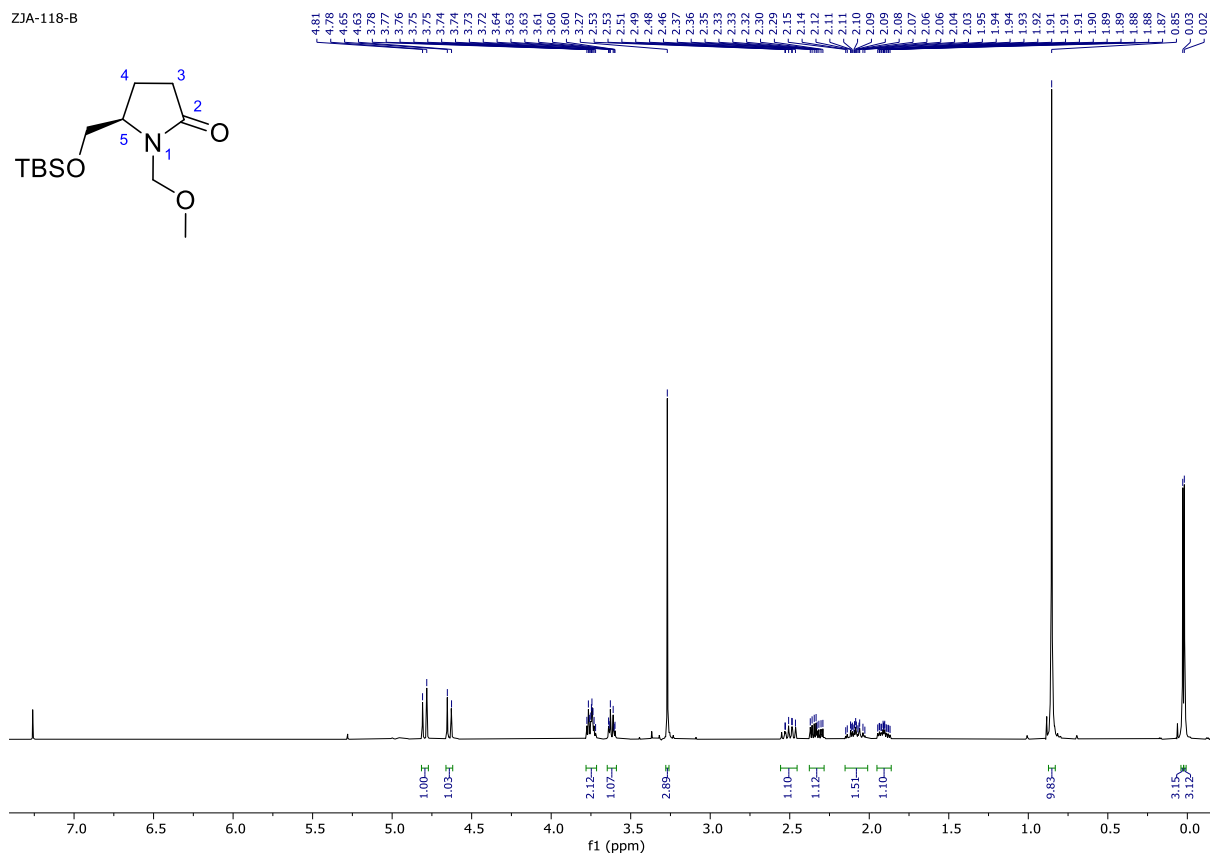

ZJA-118-B

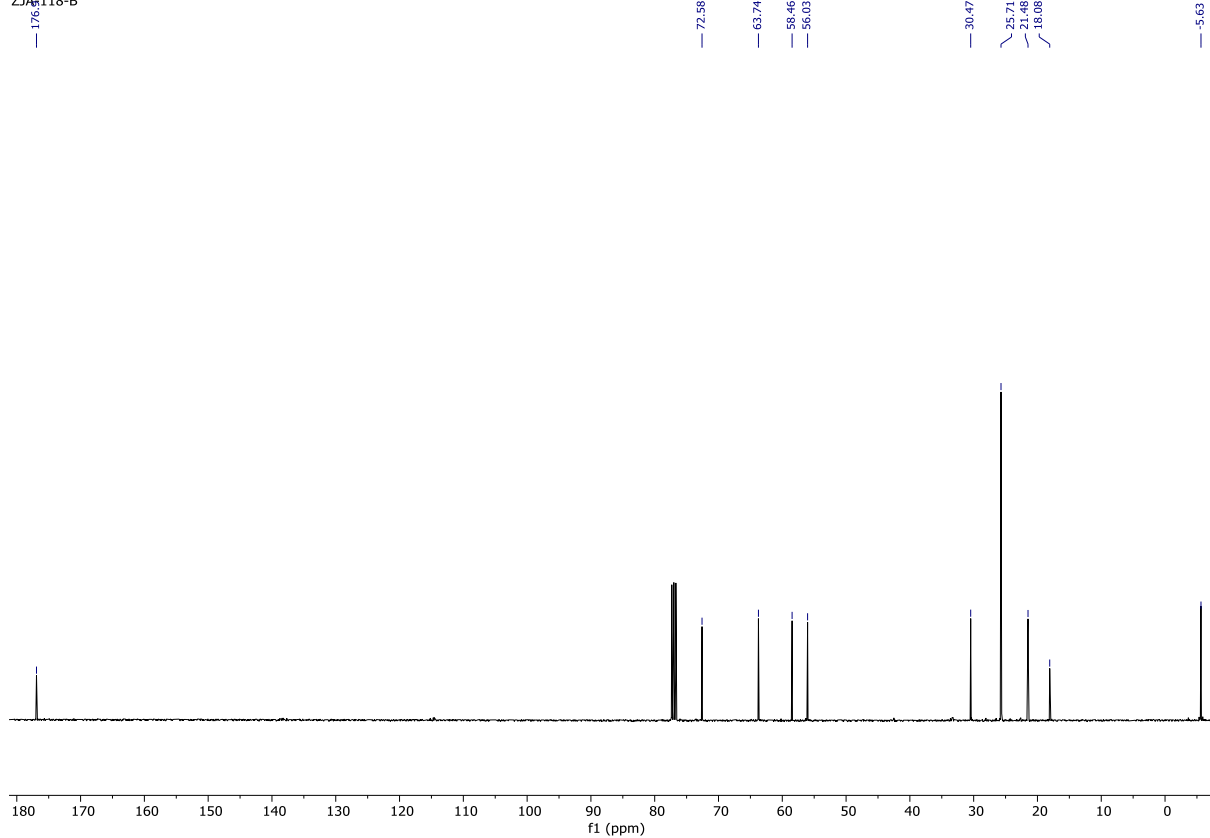

S2

ZJA-256-C  
Perlickova single pulse

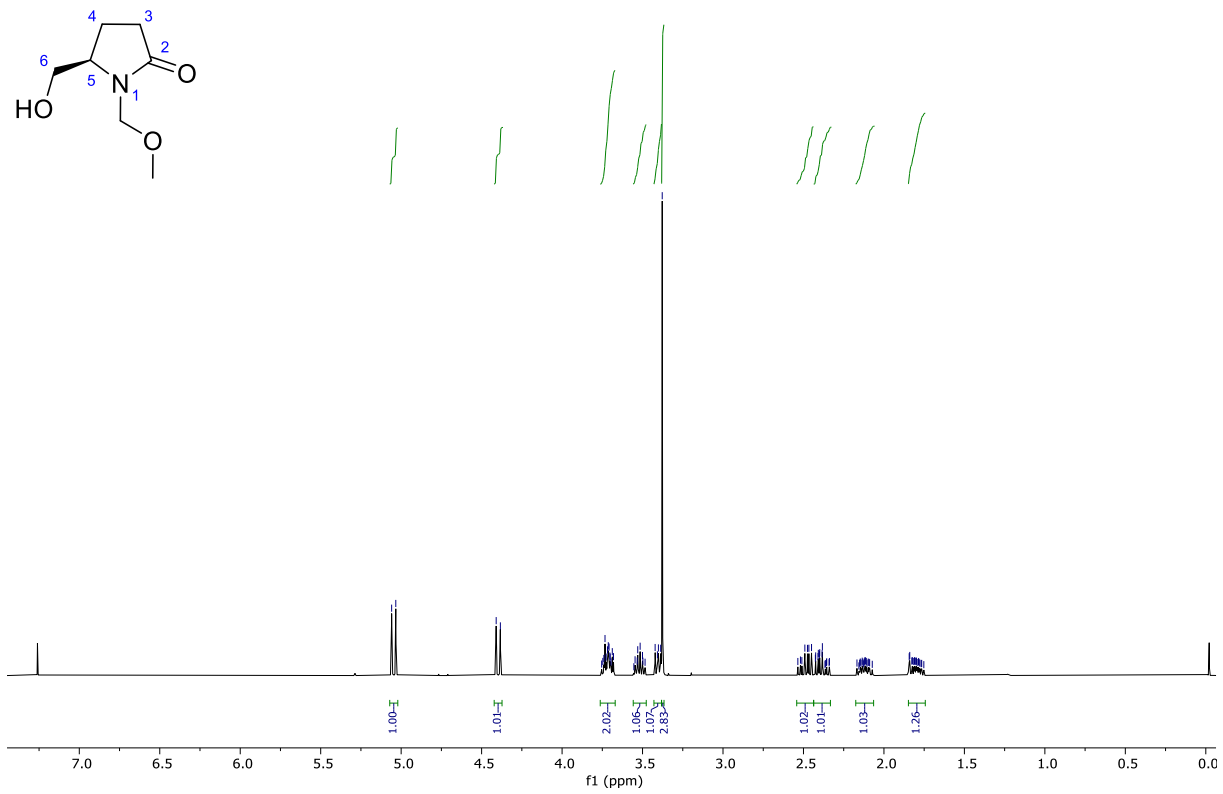

ZJA-256-C  
Perlickova single pulse decoupled gated NOE

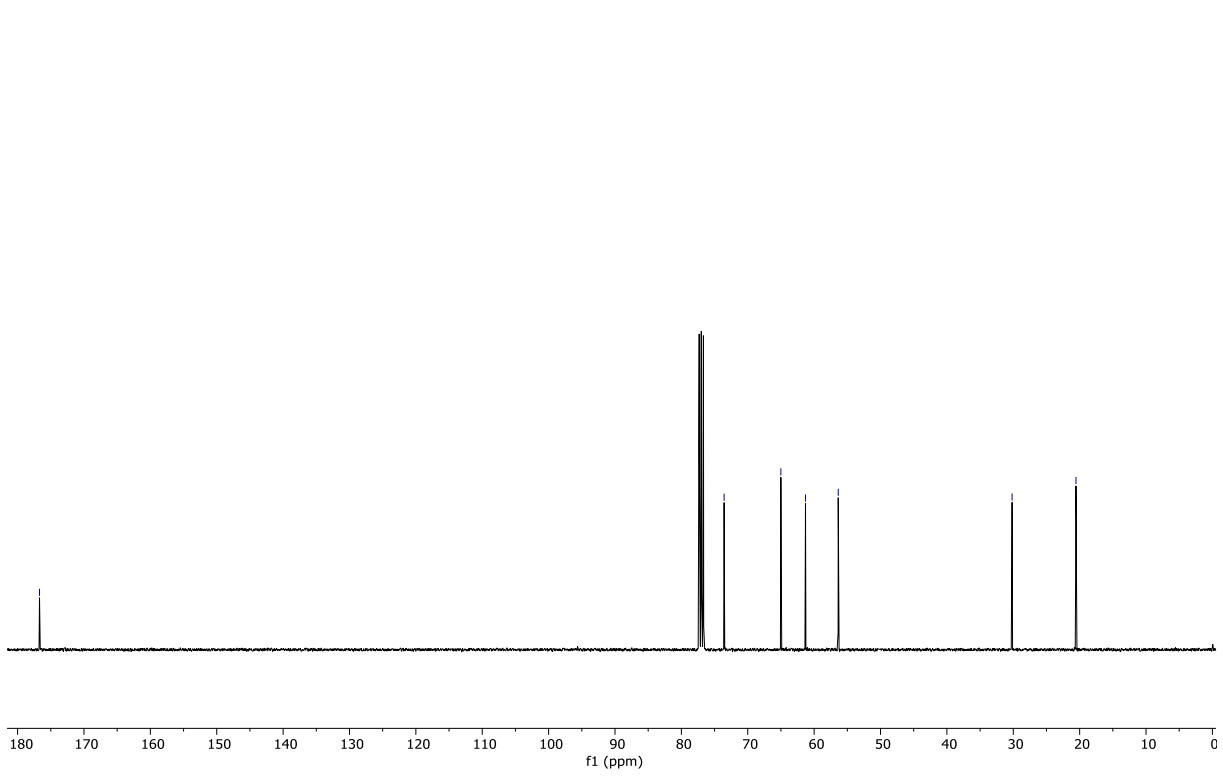

S3a

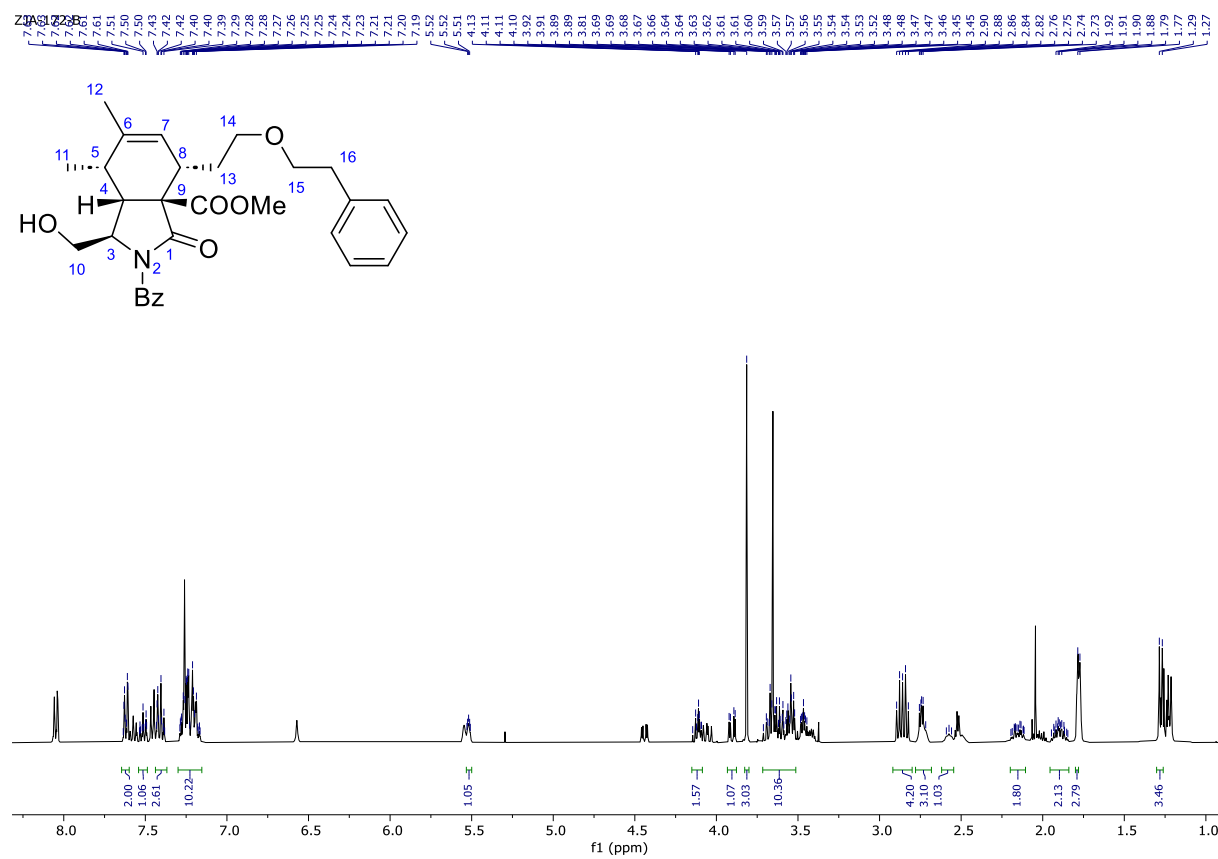

S3b

ZJA-172  
 8.00 7.98 7.97 7.96 7.95 7.94 7.93 7.92 7.91 7.90 7.89 7.88 7.87 7.86 7.85 7.84 7.83 7.82 7.81 7.80 7.79 7.78 7.77 7.76 7.75 7.74 7.73 7.72 7.71 7.70 7.69 7.68 7.67 7.66 7.65 7.64 7.63 7.62 7.61 7.60 7.59 7.58 7.57 7.56 7.55 7.54 7.46 7.44 7.43 7.42 7.41 7.40 7.39 7.38 7.37 7.36 7.35 7.34 7.33 7.32 7.31 7.30 7.29 7.28 7.27 7.26 7.25 7.24 7.23 7.22 7.21 7.20 7.19 7.18 7.17 7.16 7.15 7.14 7.13 7.12 7.11 7.10 7.09 7.08 7.07 7.06 7.05 7.04 7.03 7.02 7.01 7.00 6.99 6.98 6.97 6.96 6.95 6.94 6.93 6.92 6.91 6.90 6.89 6.88 6.87 6.86 6.85 6.84 6.83 6.82 6.81 6.80 6.79 6.78 6.77 6.76 6.75 6.74 6.73 6.72 6.71 6.70 6.69 6.68 6.67 6.66 6.65 6.64 6.63 6.62 6.61 6.60 6.59 6.58 6.57 6.56 6.55 6.54 6.53 6.52 6.51 6.50 6.49 6.48 6.47 6.46 6.45 6.44 6.43 6.42 6.41 6.40 6.39 6.38 6.37 6.36 6.35 6.34 6.33 6.32 6.31 6.30 6.29 6.28 6.27 6.26 6.25 6.24 6.23 6.22 6.21 6.20 6.19 6.18 6.17 6.16 6.15 6.14 6.13 6.12 6.11 6.10 6.09 6.08 6.07 6.06 6.05 6.04 6.03 6.02 6.01 6.00 5.99 5.98 5.97 5.96 5.95 5.94 5.93 5.92 5.91 5.90 5.89 5.88 5.87 5.86 5.85 5.84 5.83 5.82 5.81 5.80 5.79 5.78 5.77 5.76 5.75 5.74 5.73 5.72 5.71 5.70 5.69 5.68 5.67 5.66 5.65 5.64 5.63 5.62 5.61 5.60 5.59 5.58 5.57 5.56 5.55 5.54 5.53 5.52 5.51 5.50 5.49 5.48 5.47 5.46 5.45 5.44 5.43 5.42 5.41 5.40 5.39 5.38 5.37 5.36 5.35 5.34 5.33 5.32 5.31 5.30 5.29 5.28 5.27 5.26 5.25 5.24 5.23 5.22 5.21 5.20 5.19 5.18 5.17 5.16 5.15 5.14 5.13 5.12 5.11 5.10 5.09 5.08 5.07 5.06 5.05 5.04 5.03 5.02 5.01 5.00 4.99 4.98 4.97 4.96 4.95 4.94 4.93 4.92 4.91 4.90 4.89 4.88 4.87 4.86 4.85 4.84 4.83 4.82 4.81 4.80 4.79 4.78 4.77 4.76 4.75 4.74 4.73 4.72 4.71 4.70 4.69 4.68 4.67 4.66 4.65 4.64 4.63 4.62 4.61 4.60 4.59 4.58 4.57 4.56 4.55 4.54 4.53 4.52 4.51 4.50 4.49 4.48 4.47 4.46 4.45 4.44 4.43 4.42 4.41 4.40 4.39 4.38 4.37 4.36 4.35 4.34 4.33 4.32 4.31 4.30 4.29 4.28 4.27 4.26 4.25 4.24 4.23 4.22 4.21 4.20 4.19 4.18 4.17 4.16 4.15 4.14 4.13 4.12 4.11 4.10 4.09 4.08 4.07 4.06 4.05 4.04 4.03 4.02 4.01 4.00 3.99 3.98 3.97 3.96 3.95 3.94 3.93 3.92 3.91 3.90 3.89 3.88 3.87 3.86 3.85 3.84 3.83 3.82 3.81 3.80 3.79 3.78 3.77 3.76 3.75 3.74 3.73 3.72 3.71 3.70 3.69 3.68 3.67 3.66 3.65 3.64 3.63 3.62 3.61 3.60 3.59 3.58 3.57 3.56 3.55 3.54 3.53 3.52 3.51 3.50 3.49 3.48 3.47 3.46 3.45 3.44 3.43 3.42 3.41 3.40 3.39 3.38 3.37 3.36 3.35 3.34 3.33 3.32 3.31 3.30 3.29 3.28 3.27 3.26 3.25 3.24 3.23 3.22 3.21 3.20 3.19 3.18 3.17 3.16 3.15 3.14 3.13 3.12 3.11 3.10 3.09 3.08 3.07 3.06 3.05 3.04 3.03 3.02 3.01 3.00 2.99 2.98 2.97 2.96 2.95 2.94 2.93 2.92 2.91 2.90 2.89 2.88 2.87 2.86 2.85 2.84 2.83 2.82 2.81 2.80 2.79 2.78 2.77 2.76 2.75 2.74 2.73 2.72 2.71 2.70 2.69 2.68 2.67 2.66 2.65 2.64 2.63 2.62 2.61 2.60 2.59 2.58 2.57 2.56 2.55 2.54 2.53 2.52 2.51 2.50 2.49 2.48 2.47 2.46 2.45 2.44 2.43 2.42 2.41 2.40 2.39 2.38 2.37 2.36 2.35 2.34 2.33 2.32 2.31 2.30 2.29 2.28 2.27 2.26 2.25 2.24 2.23 2.22 2.21 2.20 2.19 2.18 2.17 2.16 2.15 2.14 2.13 2.12 2.11 2.10 2.09 2.08 2.07 2.06 2.05 2.04 2.03 2.02 2.01 2.00 1.99 1.98 1.97 1.96 1.95 1.94 1.93 1.92 1.91 1.90 1.89 1.88 1.87 1.86 1.85 1.84 1.83 1.82 1.81 1.80 1.79 1.78 1.77 1.76 1.75 1.74 1.73 1.72 1.71 1.70 1.69 1.68 1.67 1.66 1.65 1.64 1.63 1.62 1.61 1.60 1.59 1.58 1.57 1.56 1.55 1.54 1.53 1.52 1.51 1.50 1.49 1.48 1.47 1.46 1.45 1.44 1.43 1.42 1.41 1.40 1.39 1.38 1.37 1.36 1.35 1.34 1.33 1.32 1.31 1.30 1.29 1.28 1.27 1.26 1.25 1.24 1.23 1.22 1.21 1.20 1.19 1.18 1.17 1.16 1.15 1.14 1.13 1.12 1.11 1.10 1.09 1.08 1.07 1.06 1.05 1.04 1.03 1.02 1.01 1.00 0.99 0.98 0.97 0.96 0.95 0.94 0.93 0.92 0.91 0.90 0.89 0.88 0.87 0.86 0.85 0.84 0.83 0.82 0.81 0.80 0.79 0.78 0.77 0.76 0.75 0.74 0.73 0.72 0.71 0.70 0.69 0.68 0.67 0.66 0.65 0.64 0.63 0.62 0.61 0.60 0.59 0.58 0.57 0.56 0.55 0.54 0.53 0.52 0.51 0.50 0.49 0.48 0.47 0.46 0.45 0.44 0.43 0.42 0.41 0.40 0.39 0.38 0.37 0.36 0.35 0.34 0.33 0.32 0.31 0.30 0.29 0.28 0.27 0.26 0.25 0.24 0.23 0.22 0.21 0.20 0.19 0.18 0.17 0.16 0.15 0.14 0.13 0.12 0.11 0.10 0.09 0.08 0.07 0.06 0.05 0.04 0.03 0.02 0.01 0.00

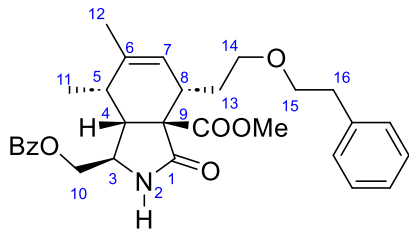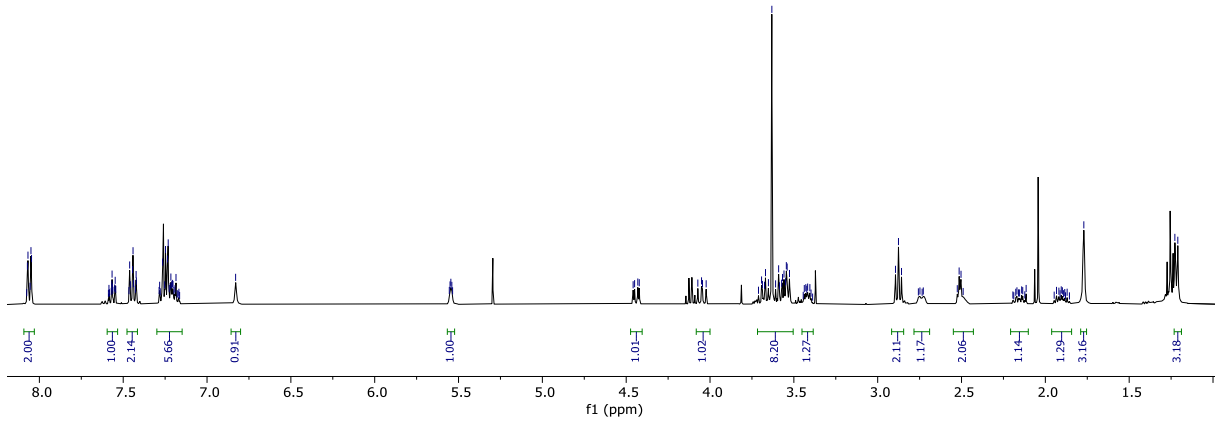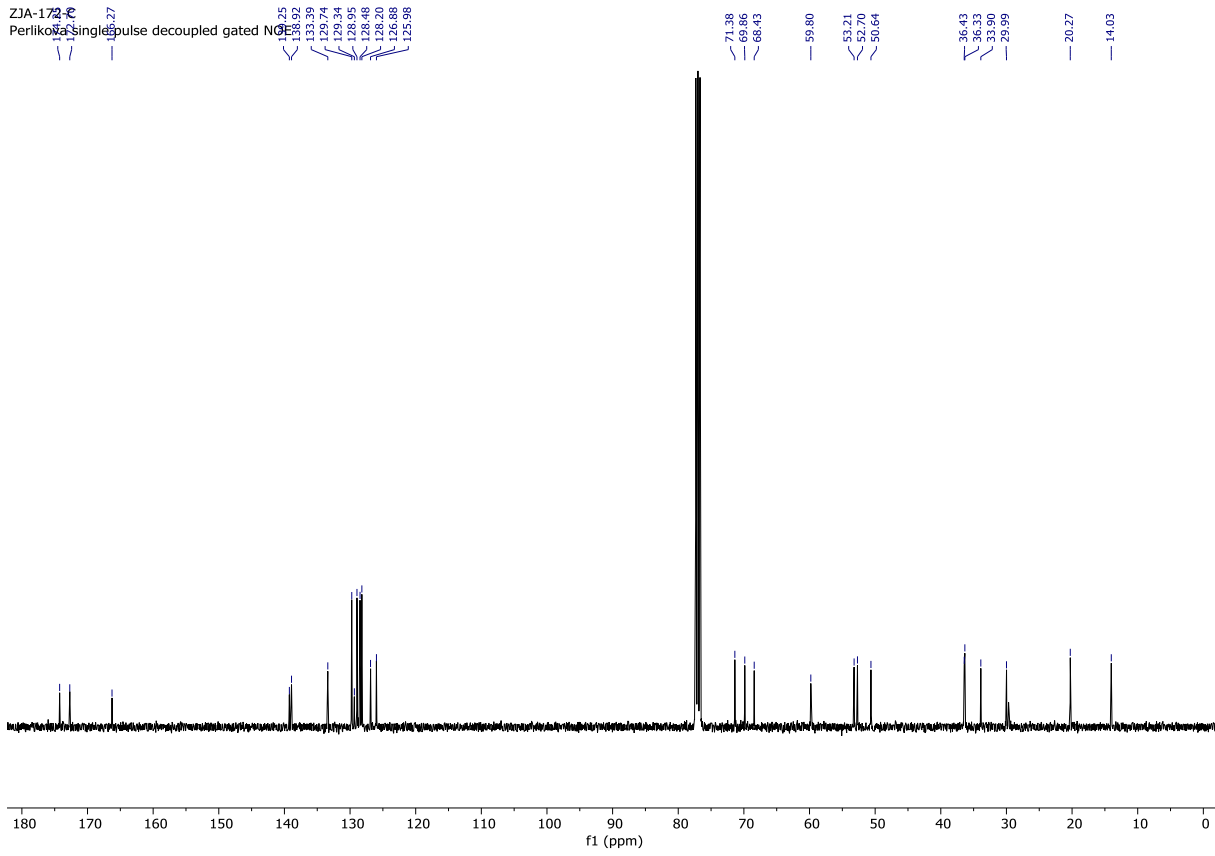

Supplement: d4ob00634h1.pdf [file d4ob00634h1.pdf]
